# Supplementary material for: A chiral auxiliary-based synthesis of the C5–C17 trans-decalin framework of anthracimycin
Source: Royal Society of Chemistry journal article supplement (doi:10.1039/c9qo00769e), 2019-01-01
Supplement: c9qo00769e1.pdf [file c9qo00769e1.pdf]

# A Chiral Auxiliary-Based Synthesis of the C5-C17 *trans*-Decalin Framework of Anthracimycin

Jared L. Freeman, Margaret A. Brimble\* and Daniel P. Furkert\*

*School of Chemical Sciences and Maurice Wilkins Centre for Molecular Biodiscovery  
University of Auckland, 23 Symonds Street, Auckland 1142, New Zealand.*

*\*Corresponding authors: [d.furkert@auckland.ac.nz](mailto:d.furkert@auckland.ac.nz), [m.brimble@auckland.ac.nz](mailto:m.brimble@auckland.ac.nz)*

## Supporting Information

|     |                                                |
|-----|------------------------------------------------|
| S2  | General Information                            |
| S3  | <sup>1</sup> H and <sup>13</sup> C NMR Spectra |
| S21 | NOESY Spectra for <b>17</b> + <b>18</b>        |
| S22 | X-ray structure for <b>22</b>                  |

## General Information

All reactions were carried out in flame- or oven-dried glassware under a dry nitrogen atmosphere unless otherwise stated.  $\text{CH}_2\text{Cl}_2$ ,  $(\text{CH}_3)_2\text{CO}$ , DMF, THF  $\text{CH}_3\text{CN}$  and  $\text{Et}_2\text{O}$  were obtained from a solvent purifier from LC Technology Systems. Triethylamine was distilled from calcium hydride. All other reagents were used as received unless otherwise noted. Yields refer to chromatographically and spectroscopically ( $^1\text{H}$  NMR) homogenous materials, unless otherwise stated. Reactions performed at low temperature were either cooled with an acetone/dry ice bath to reach  $-78\text{ }^\circ\text{C}$ , or acetone/brine/dry ice bath to reach  $-30\text{ }^\circ\text{C}$ , or a water ice bath to reach  $0\text{ }^\circ\text{C}$ . Flash chromatography was carried out using 0.063-0.1 mm silica gel with the required solvent system. TLC was carried out using 0.2 mm Kieselgel F254 (Merck) silica plates and compounds were visualised using UV irradiation at 365 nm and/or staining with vanillin in methanolic sulphuric acid or potassium permanganate and potassium carbonate in aqueous sodium hydroxide. Melting points were measured with a Kofler hot-stage apparatus and are uncorrected. NMR spectra were recorded as indicated on the Bruker DRX-400 spectrometer operating at 400 MHz for  $^1\text{H}$  nuclei, 100 MHz for  $^{13}\text{C}$  nuclei and 282 MHz for  $^{19}\text{F}$  nuclei. All chemical shifts are reported in ppm relative to tetramethylsilane ( $\delta = 0$  for  $^1\text{H}$  NMR) and  $\text{CDCl}_3$  ( $\delta = 77.0$  for  $^{13}\text{C}$  NMR).  $^1\text{H}$  NMR data is reported as chemical shift, relative integral, multiplicity (s, singlet; d, doublet; t, triplet; q, quartet; dd, doublet of doublets; m, multiplet), coupling constant ( $J$ , Hz), and assignment. Assignments were made with the aid of COSY, NOESY and HSQC experiments where required. High resolution mass spectra were recorded using a VG-70SE spectrometer at a nominal accelerating voltage of 70 eV or on a Bruker micrOTOF-Q II mass spectrometer.

# Ester S1

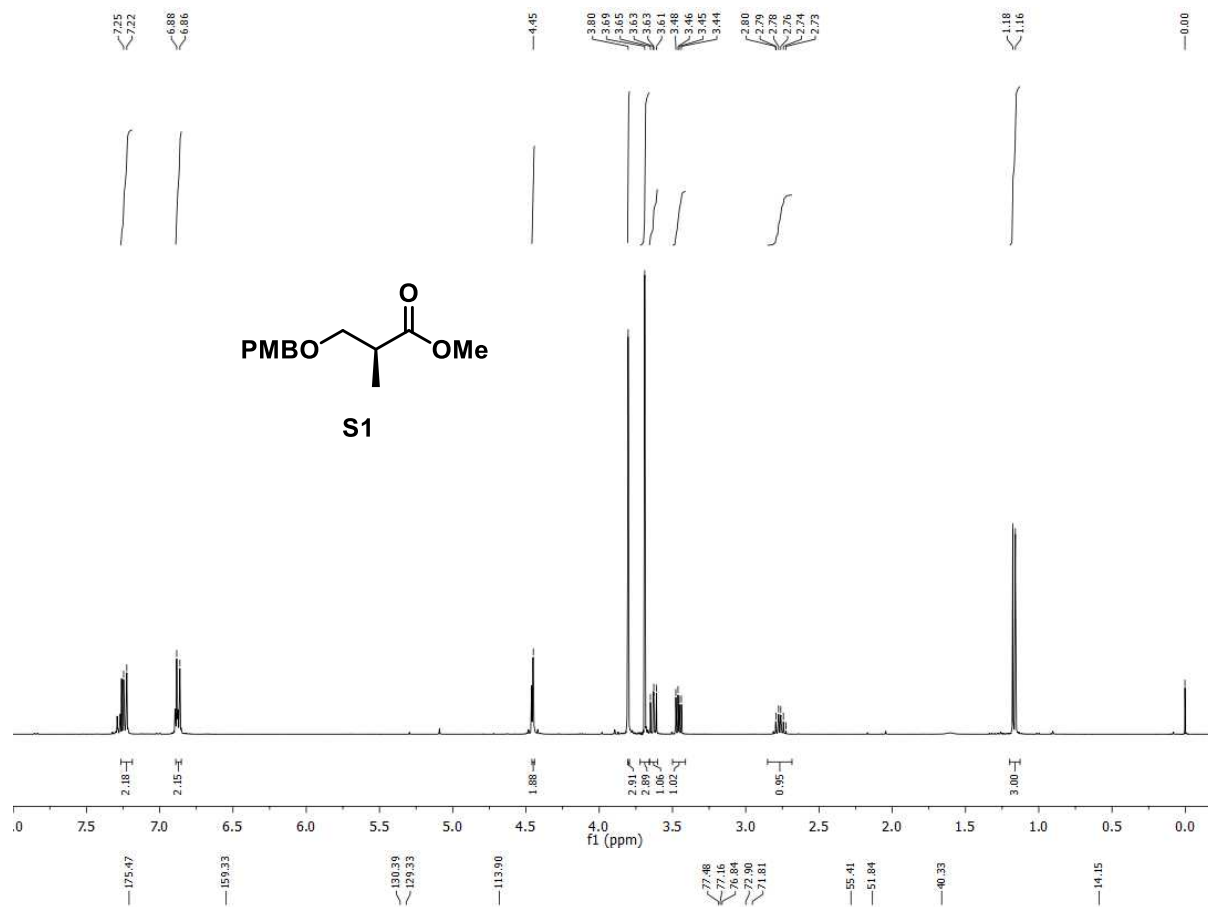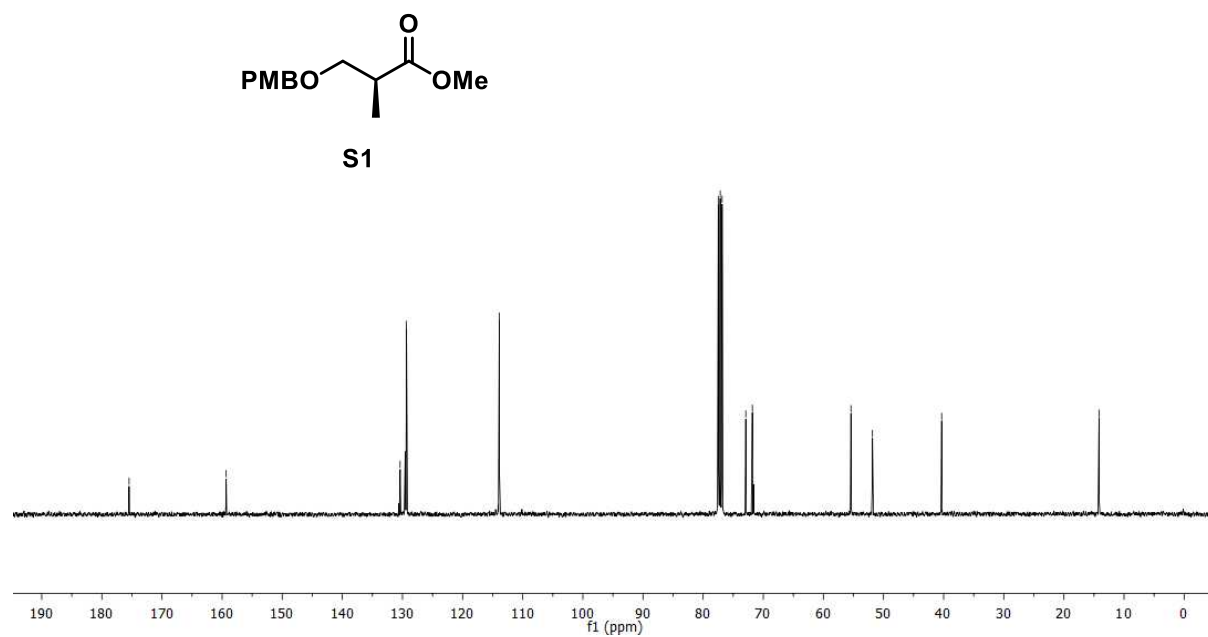

# Alcohol S2

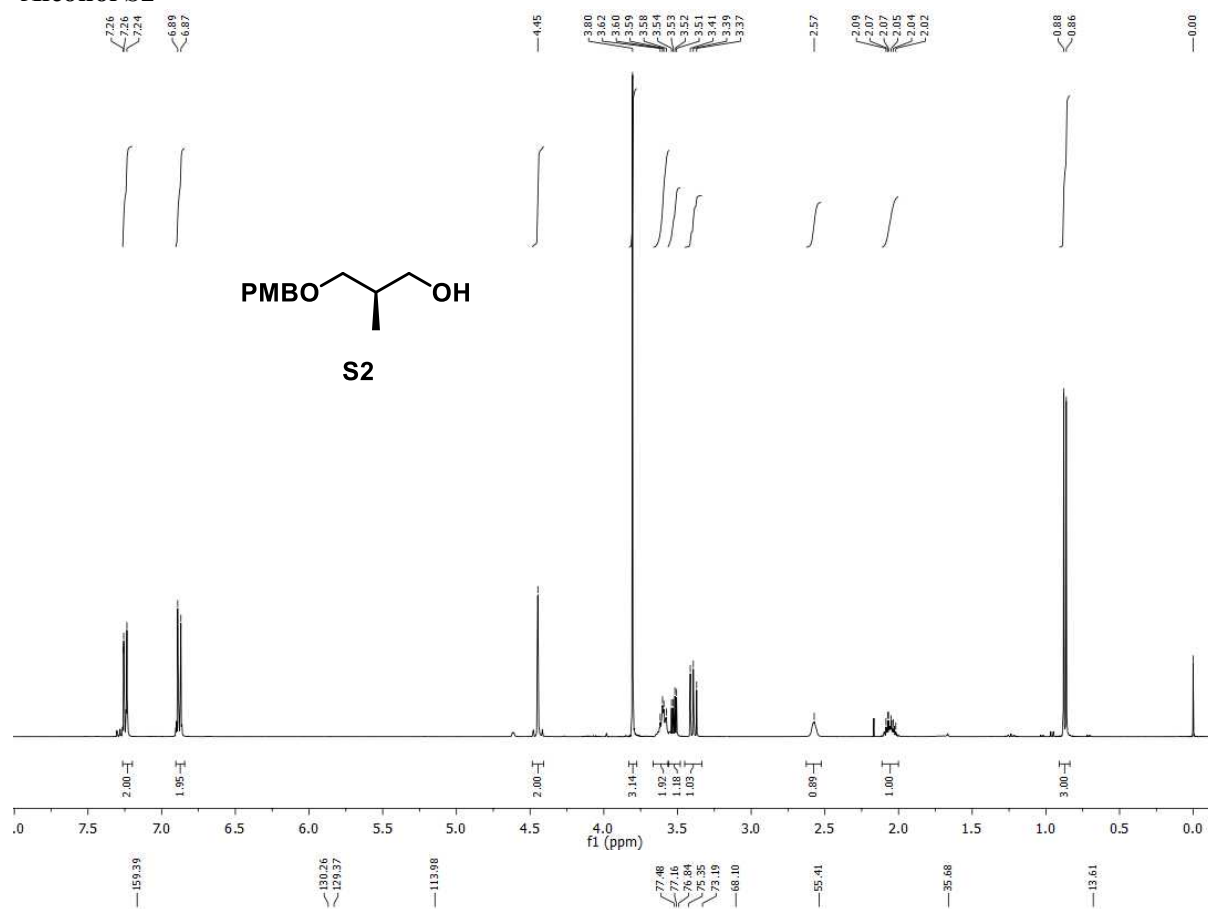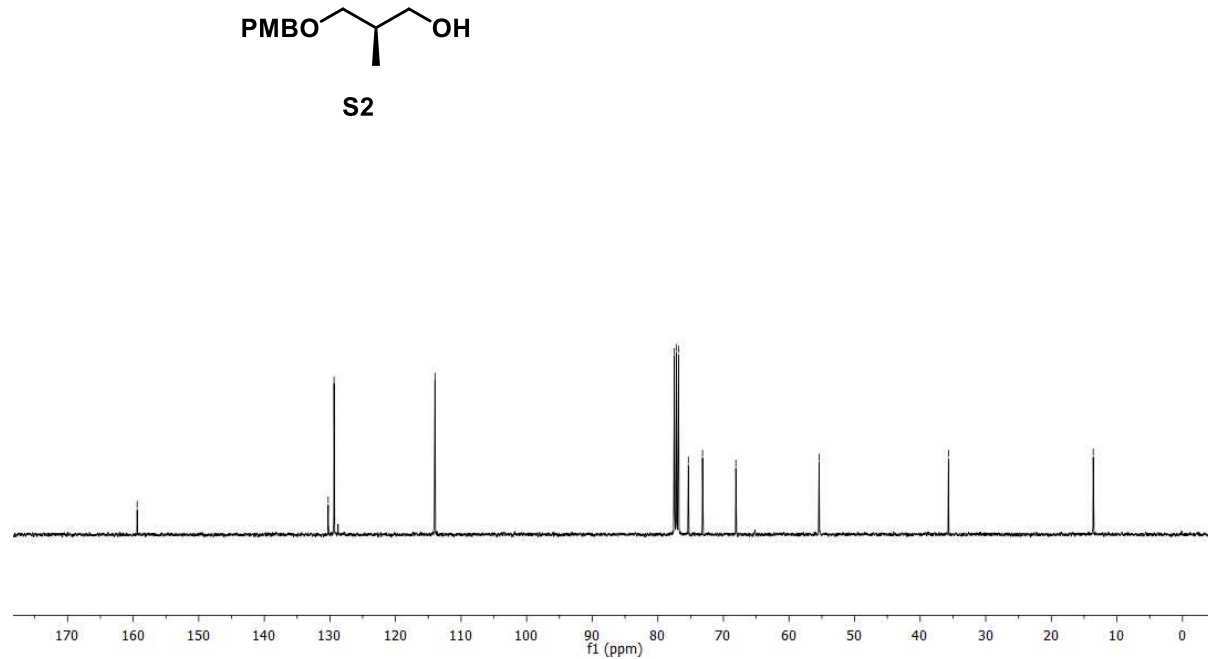

# Sulfide S3

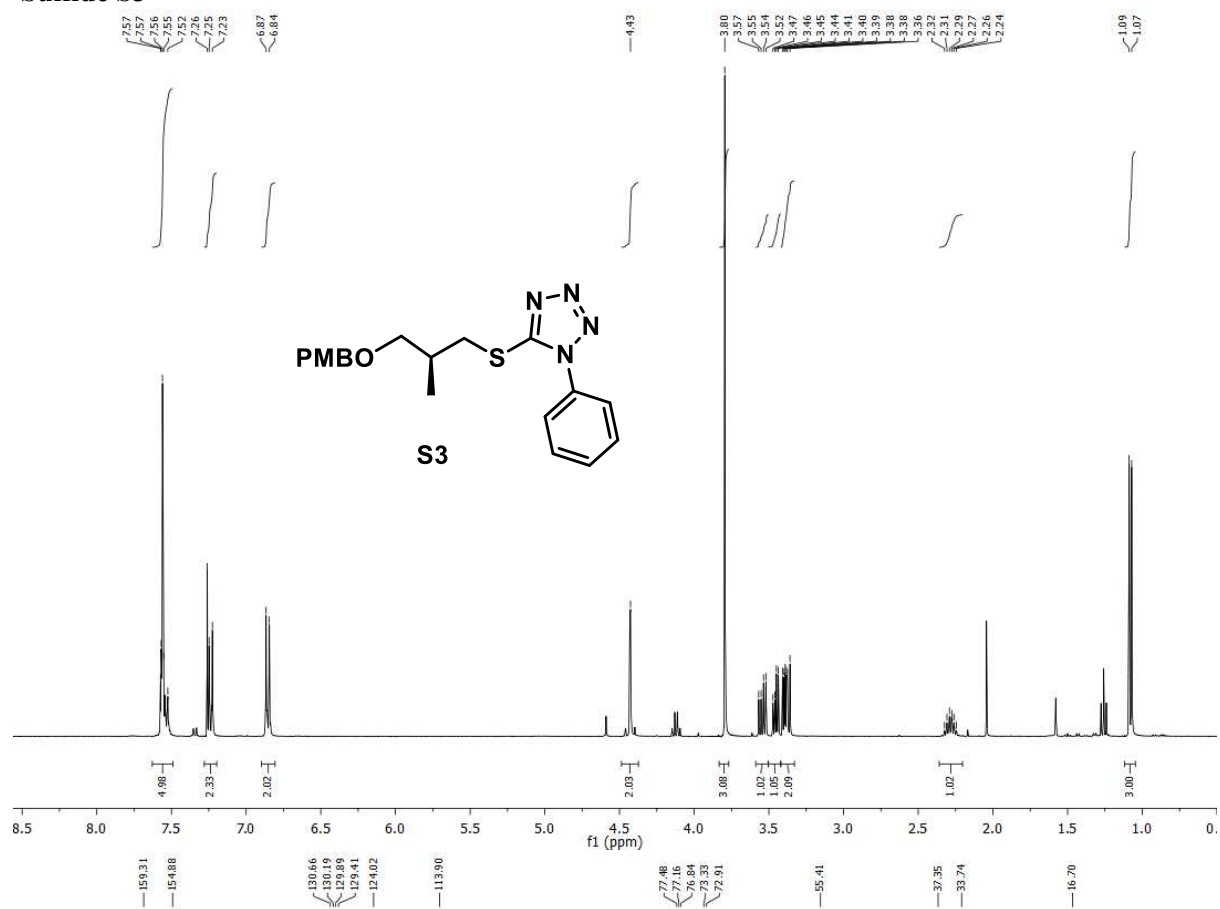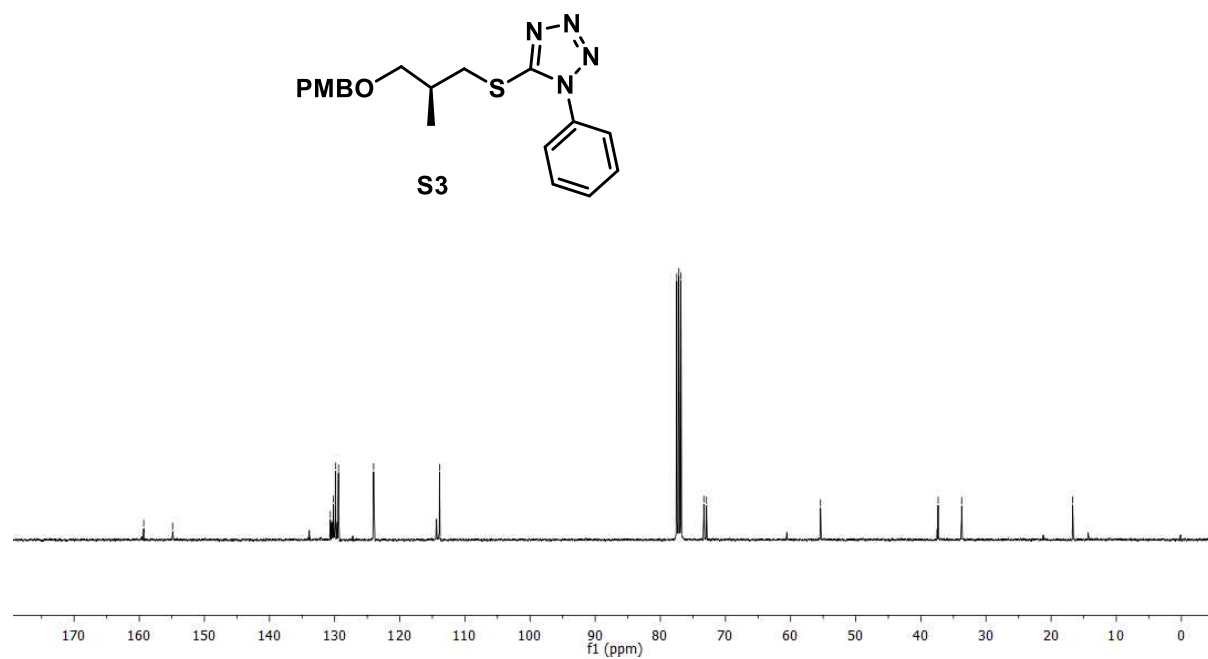

# Sulfone 8

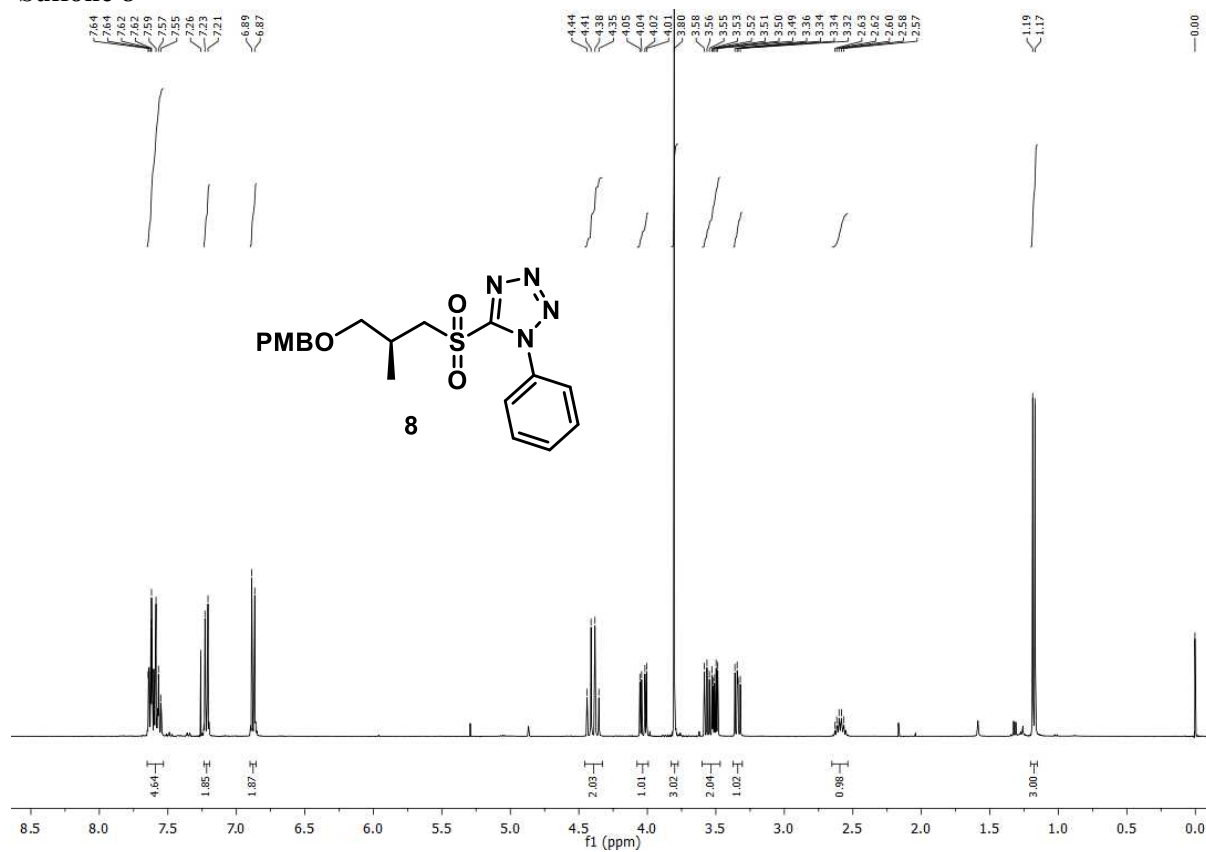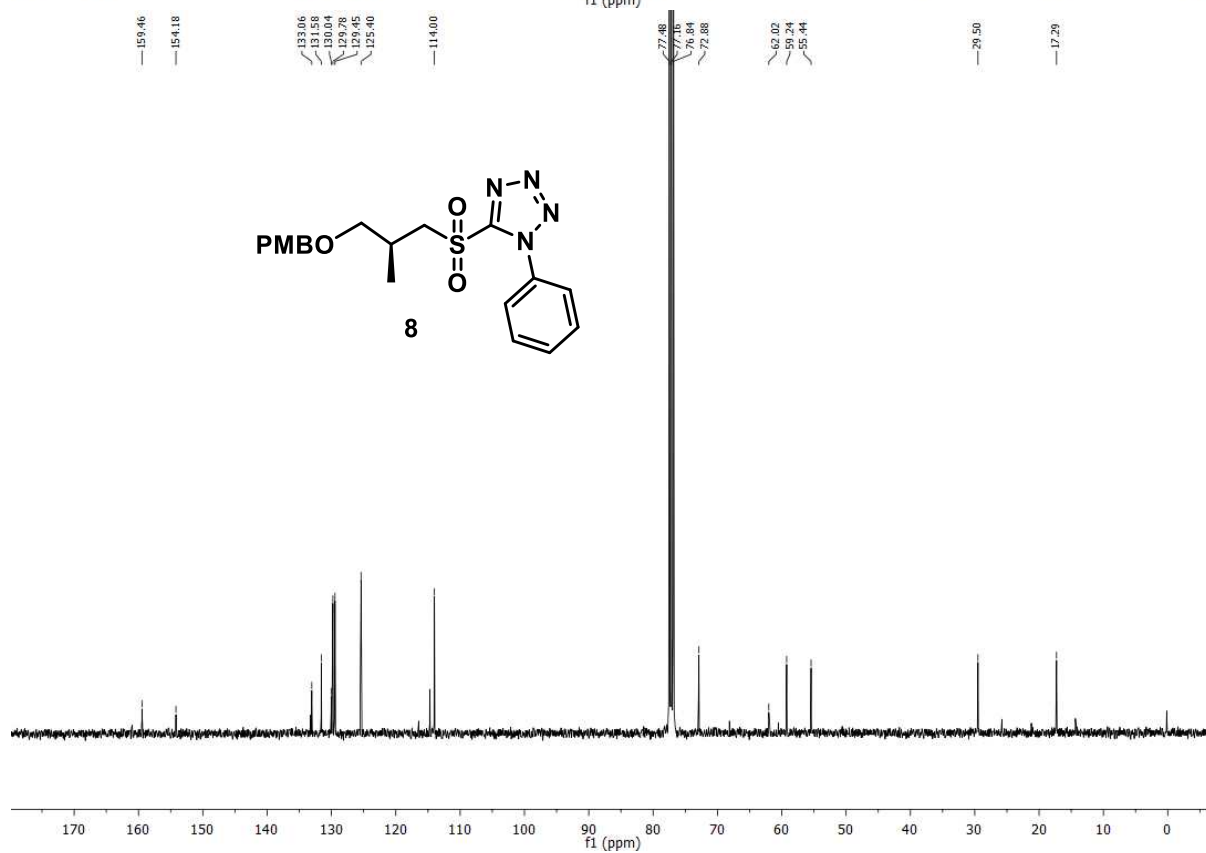

# Alcohol S4

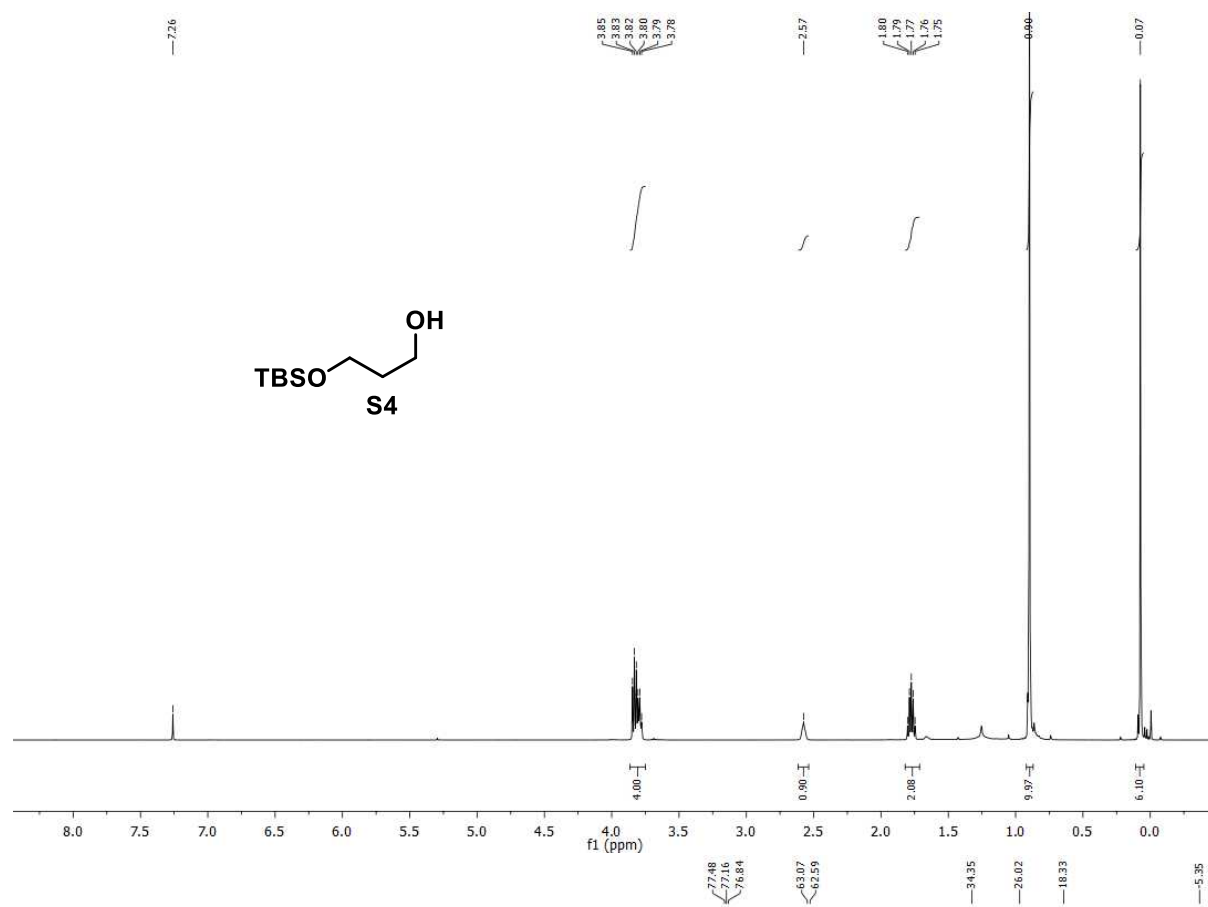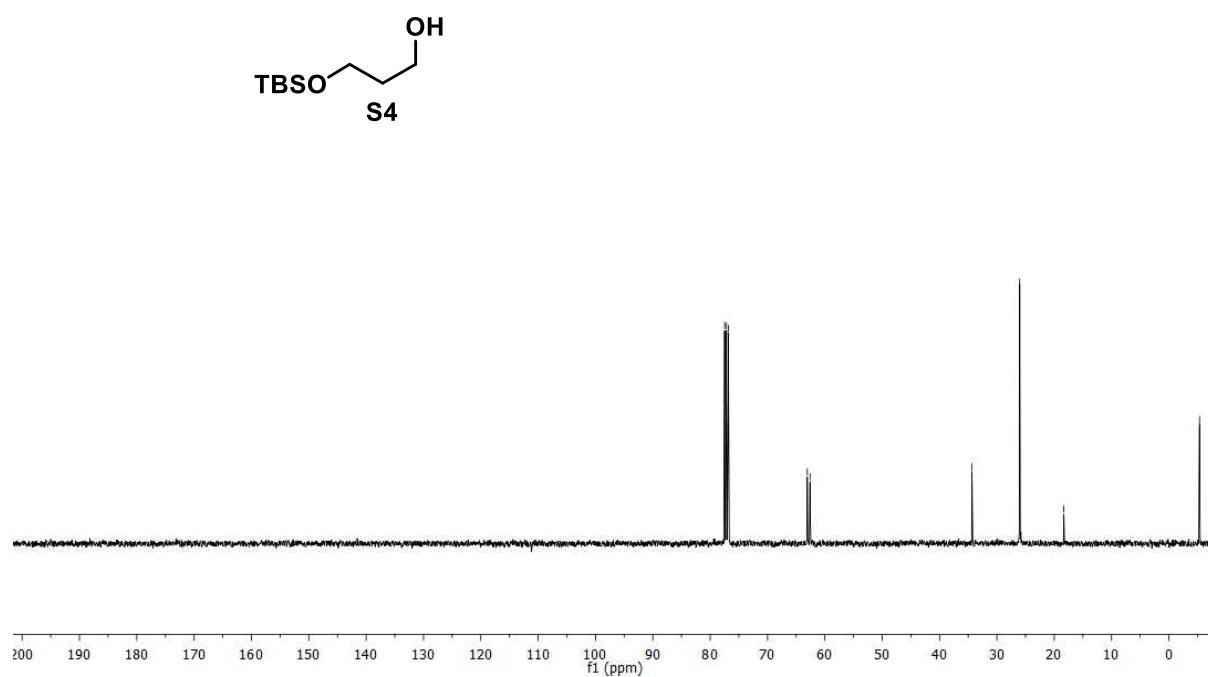

# Aldehyde 11

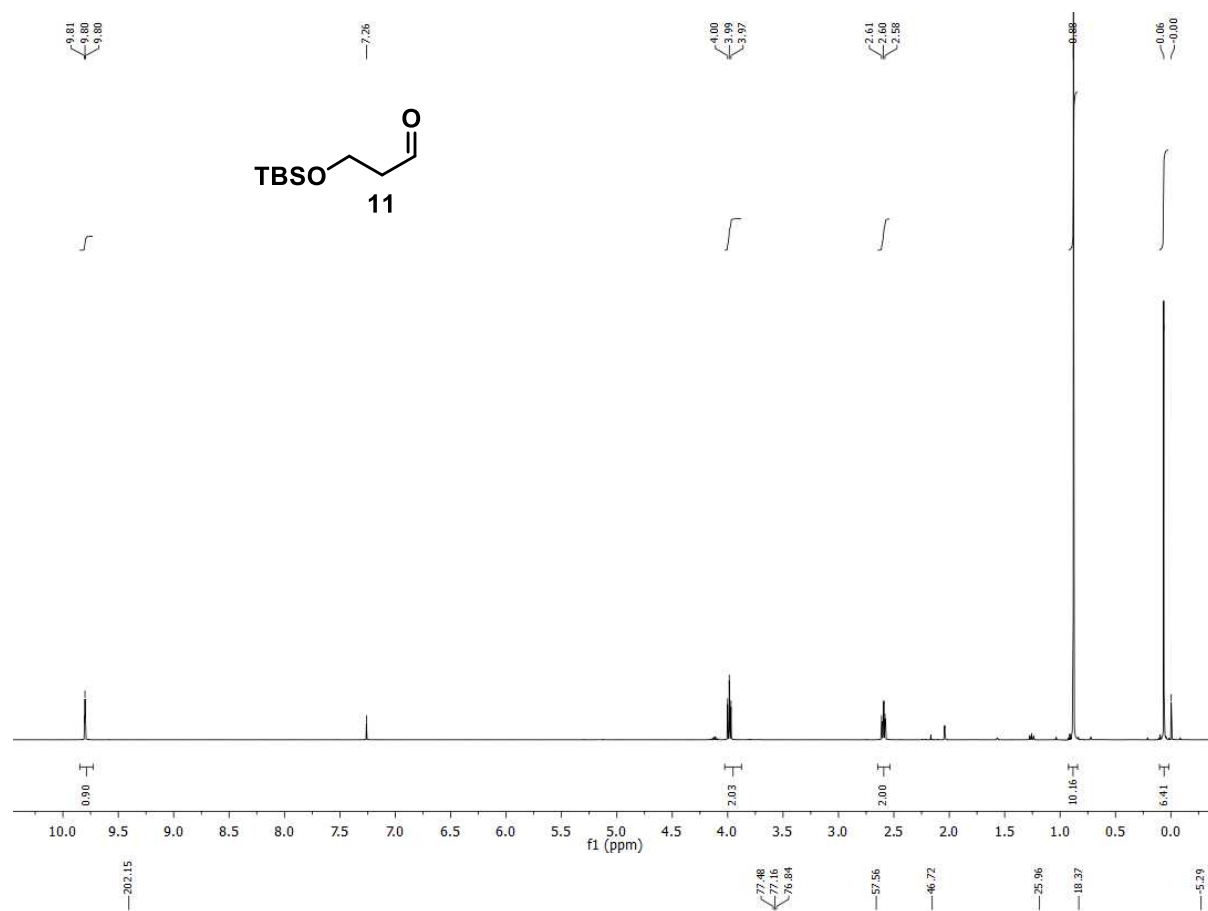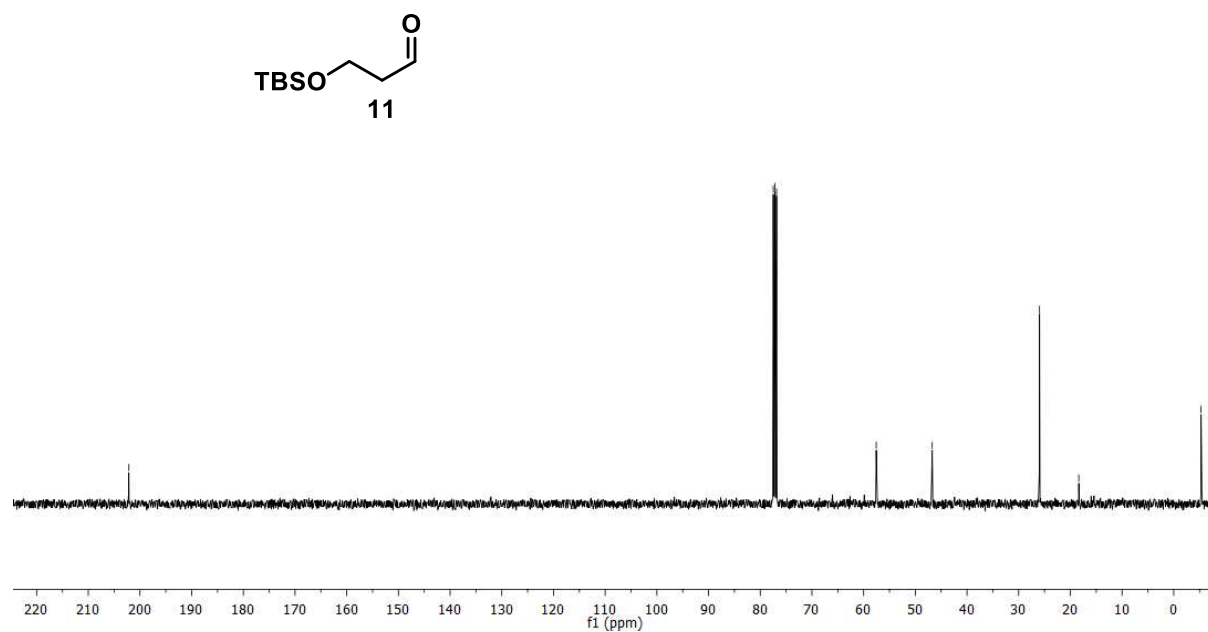

# Iodide 12

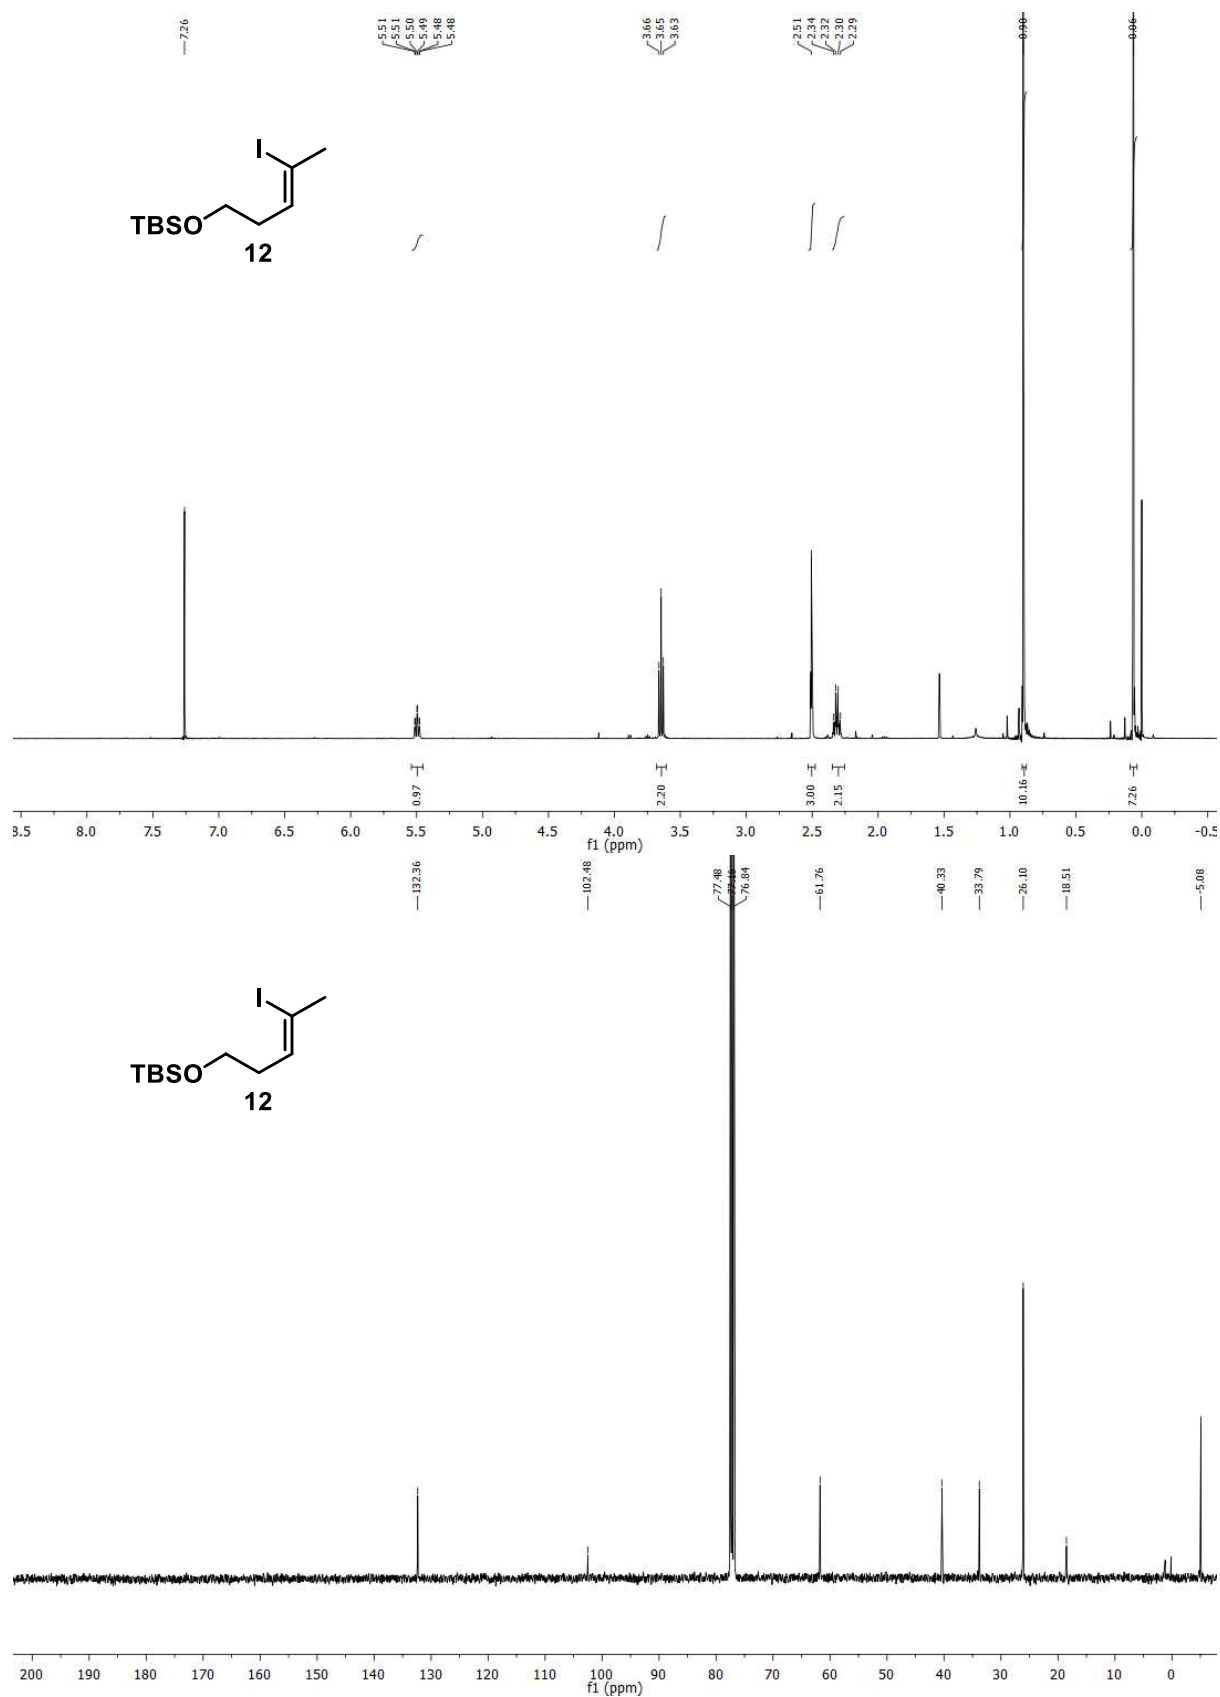

# Alkene S5

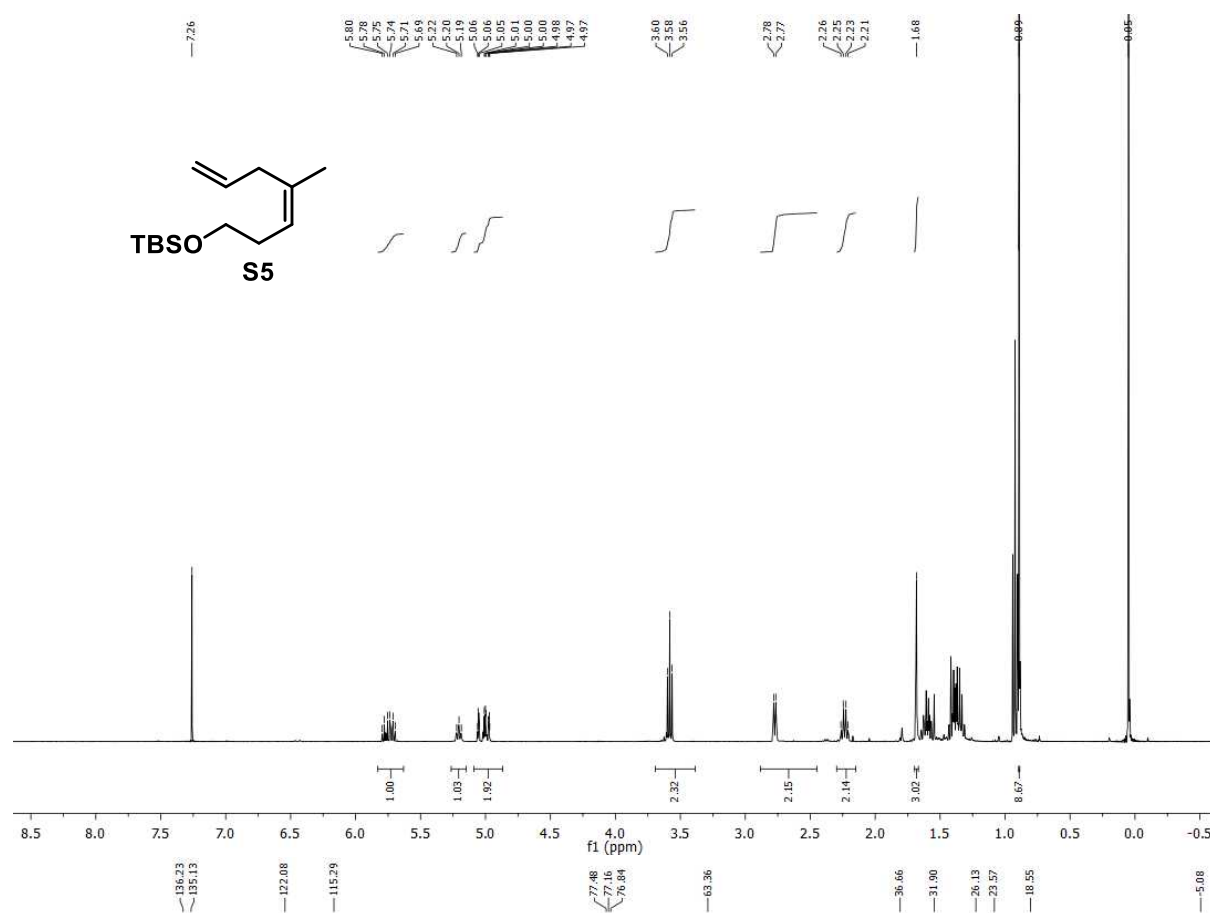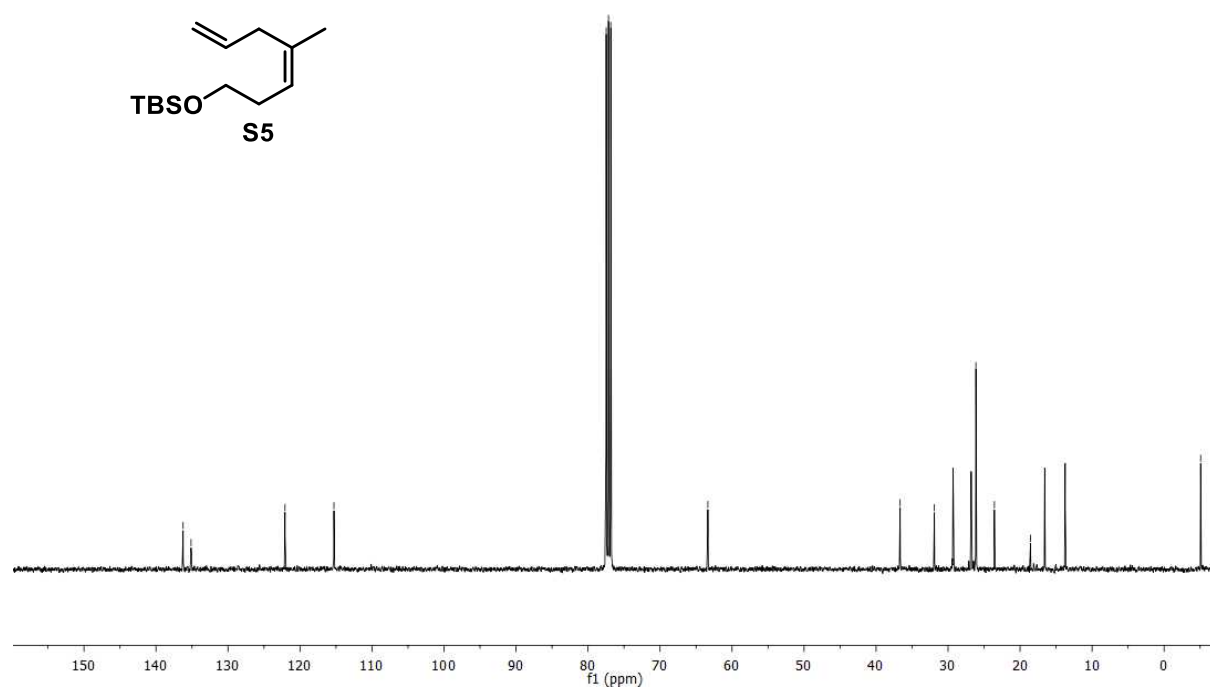

# Aldehyde 9

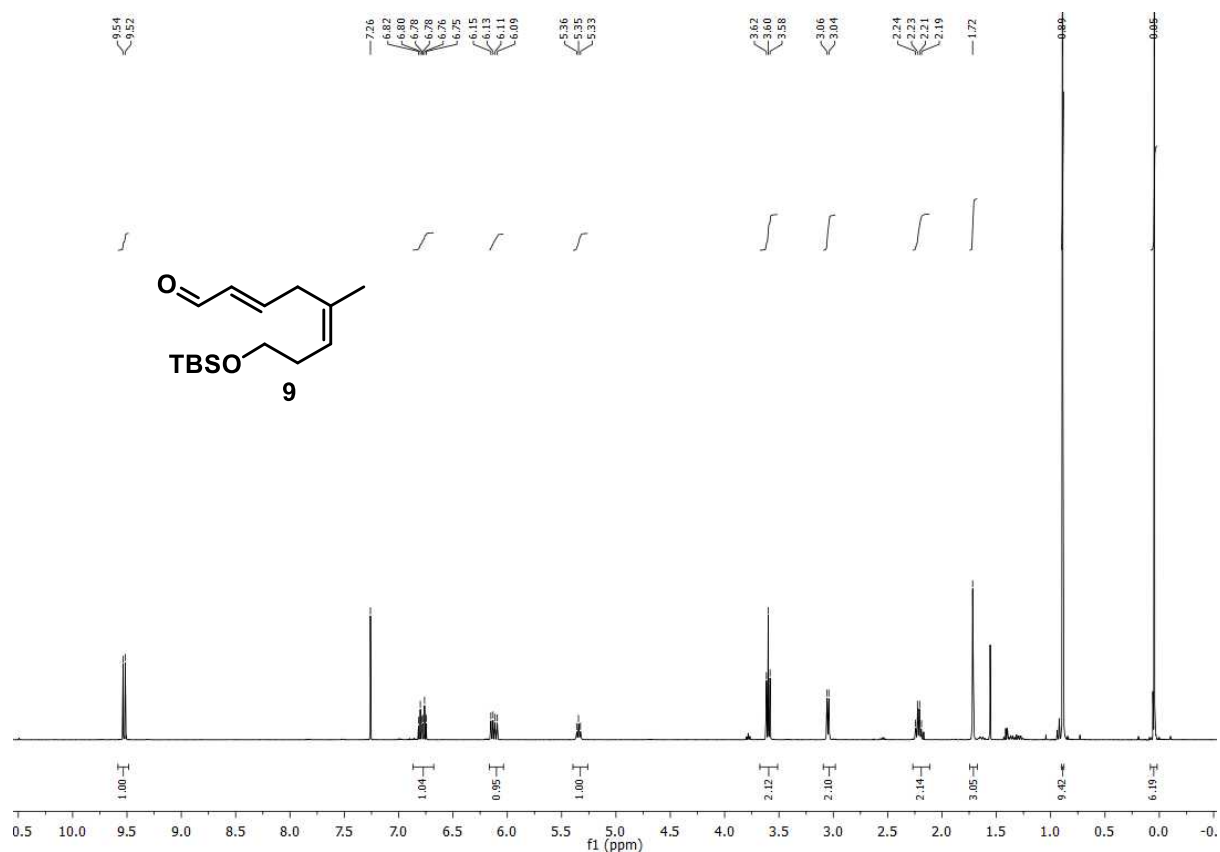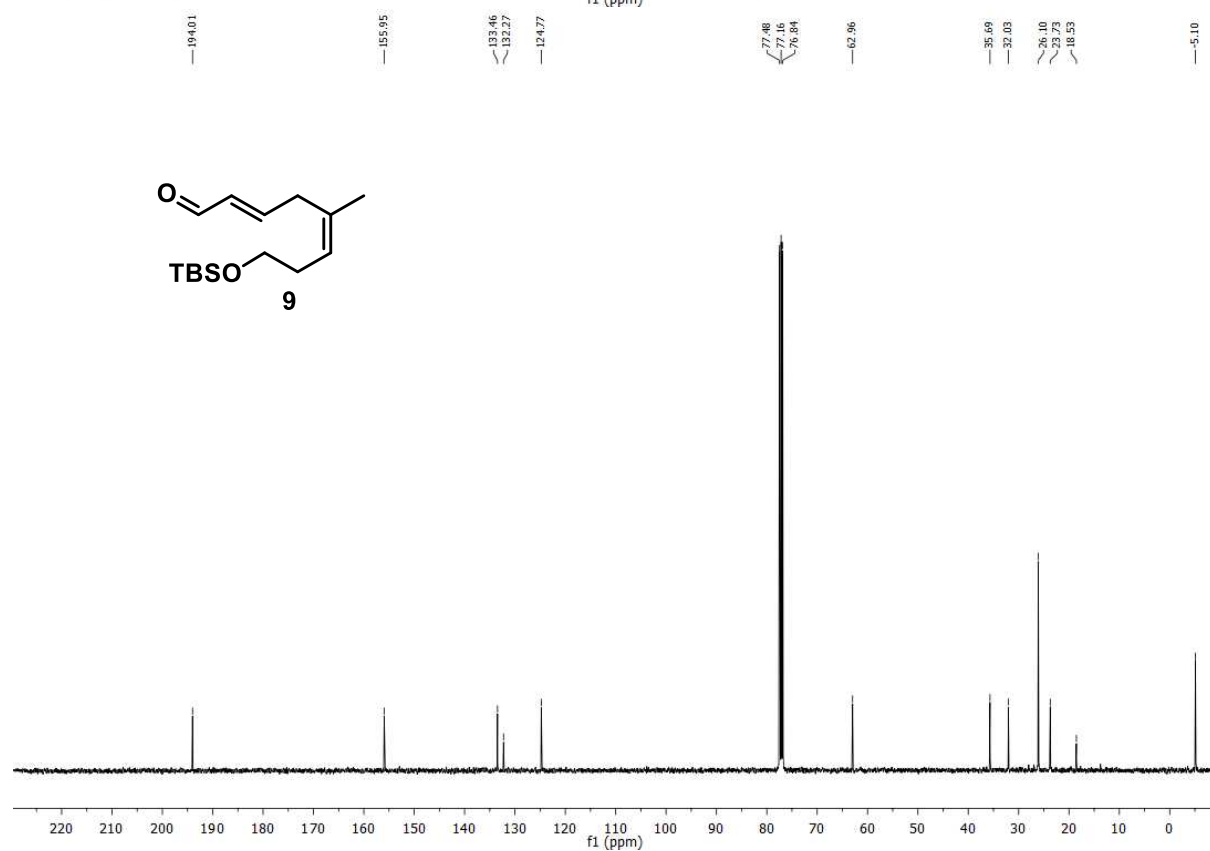

# Skipped Triene 7

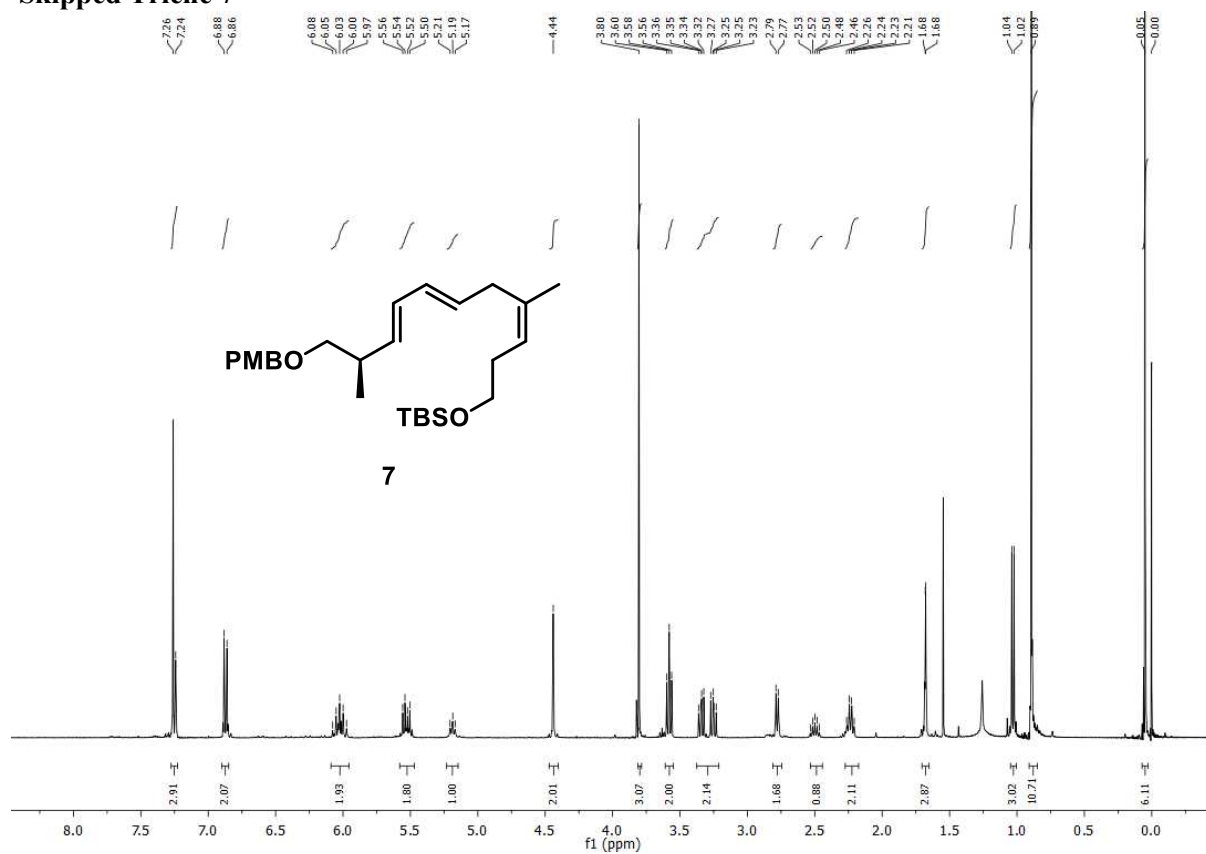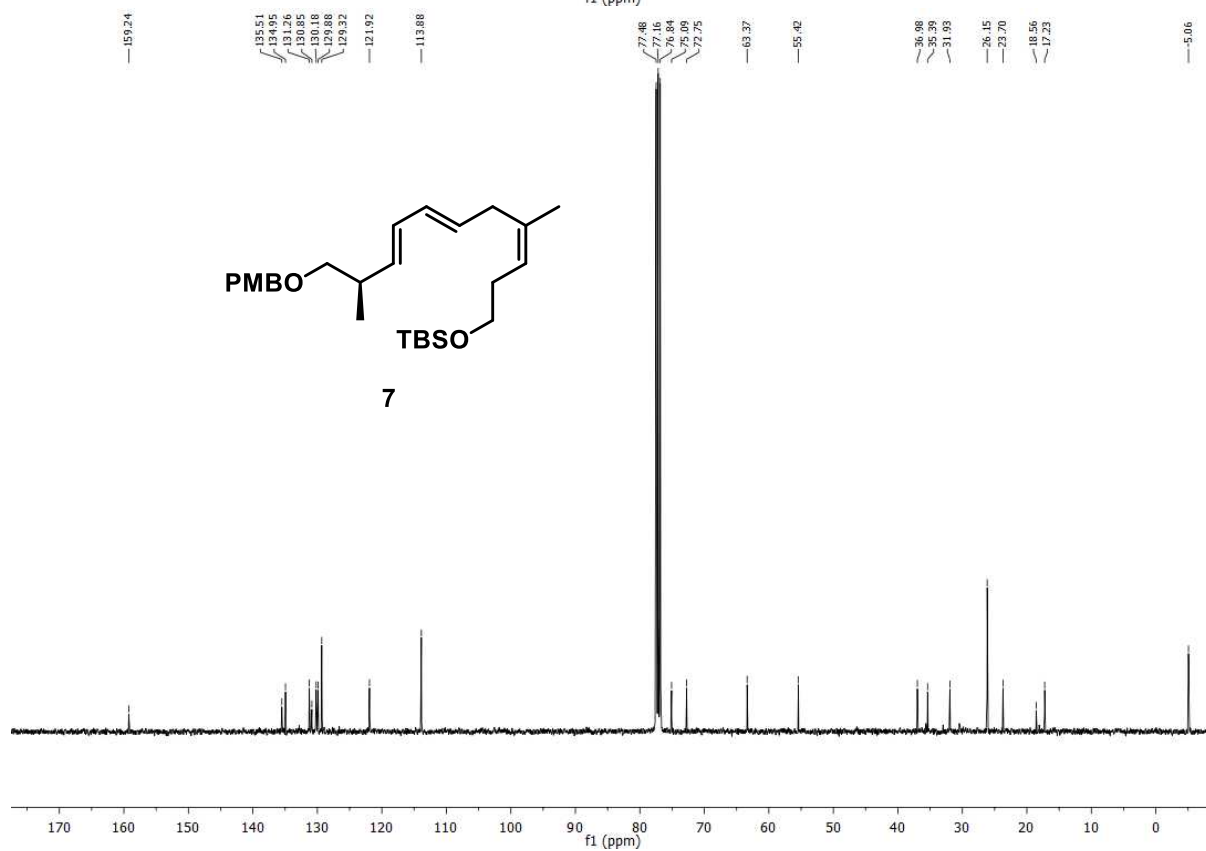

# Alcohol 21

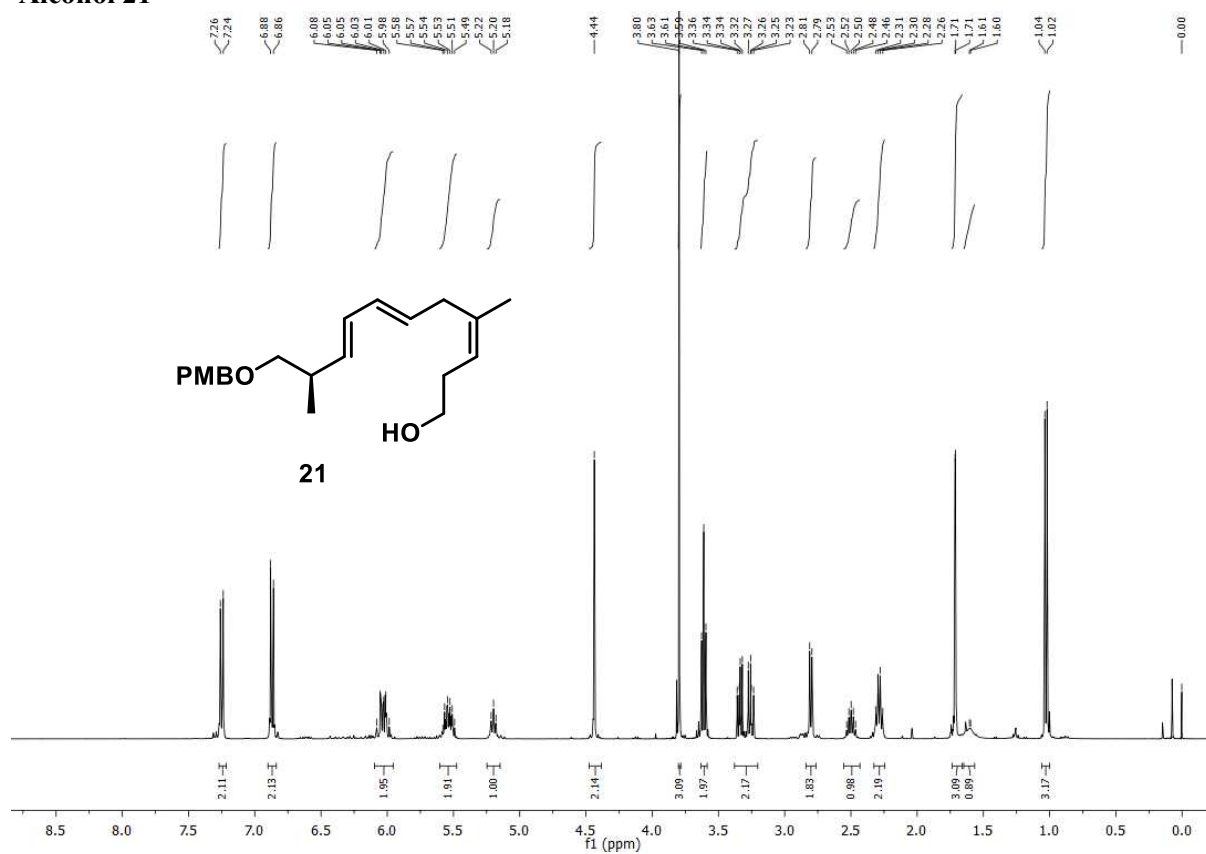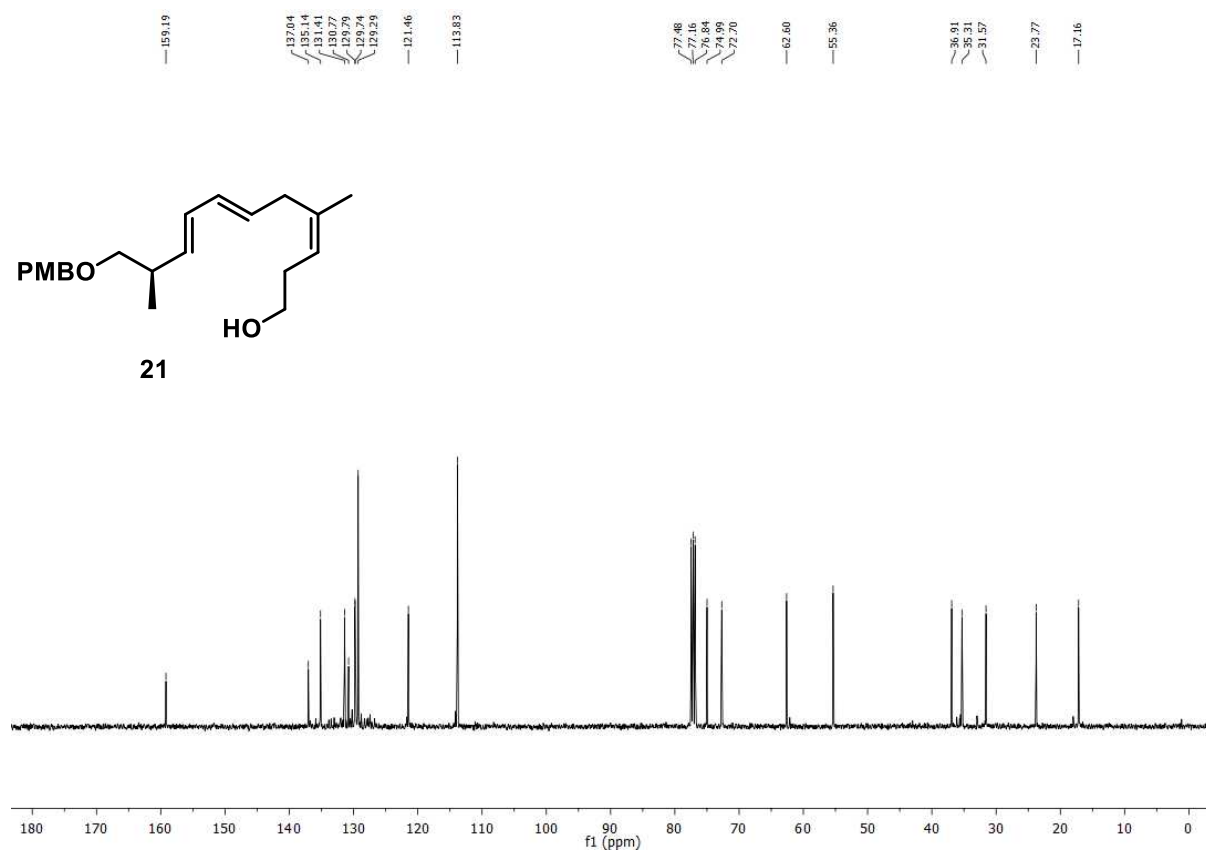

# Aldehyde S6

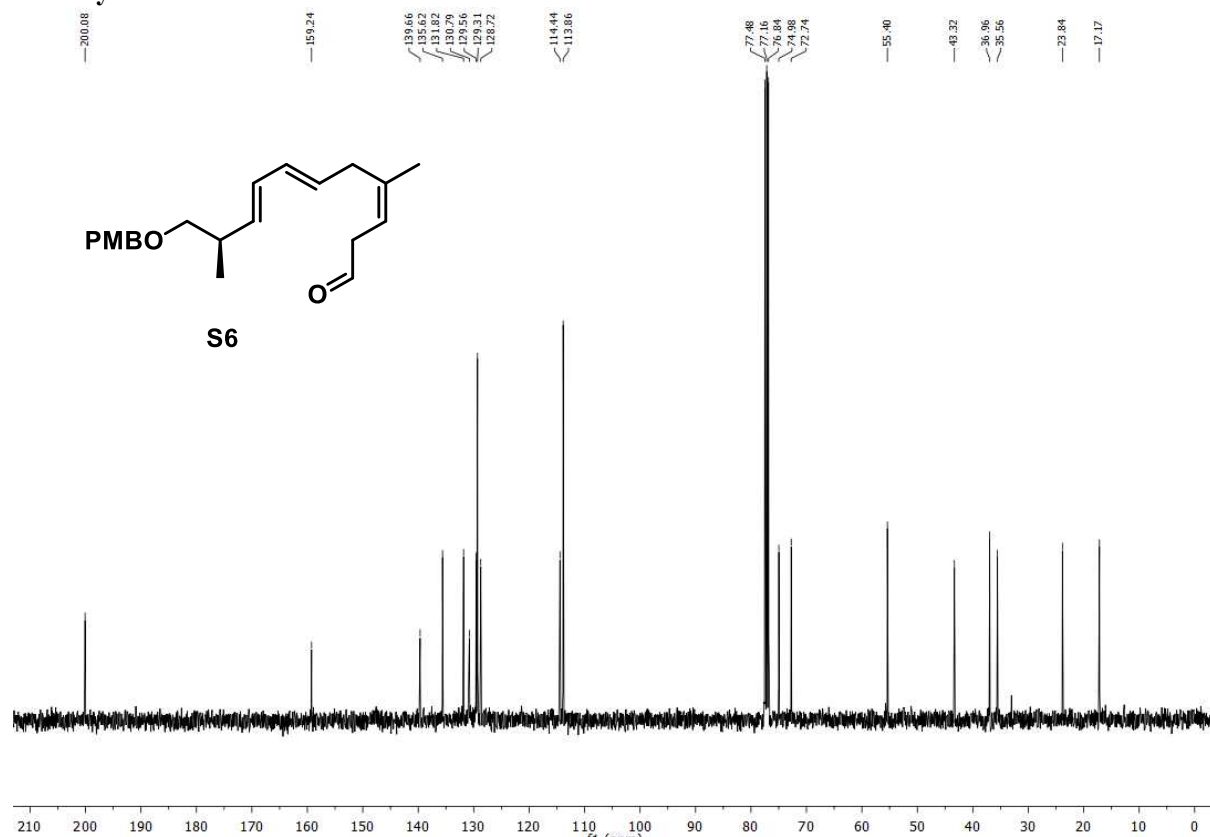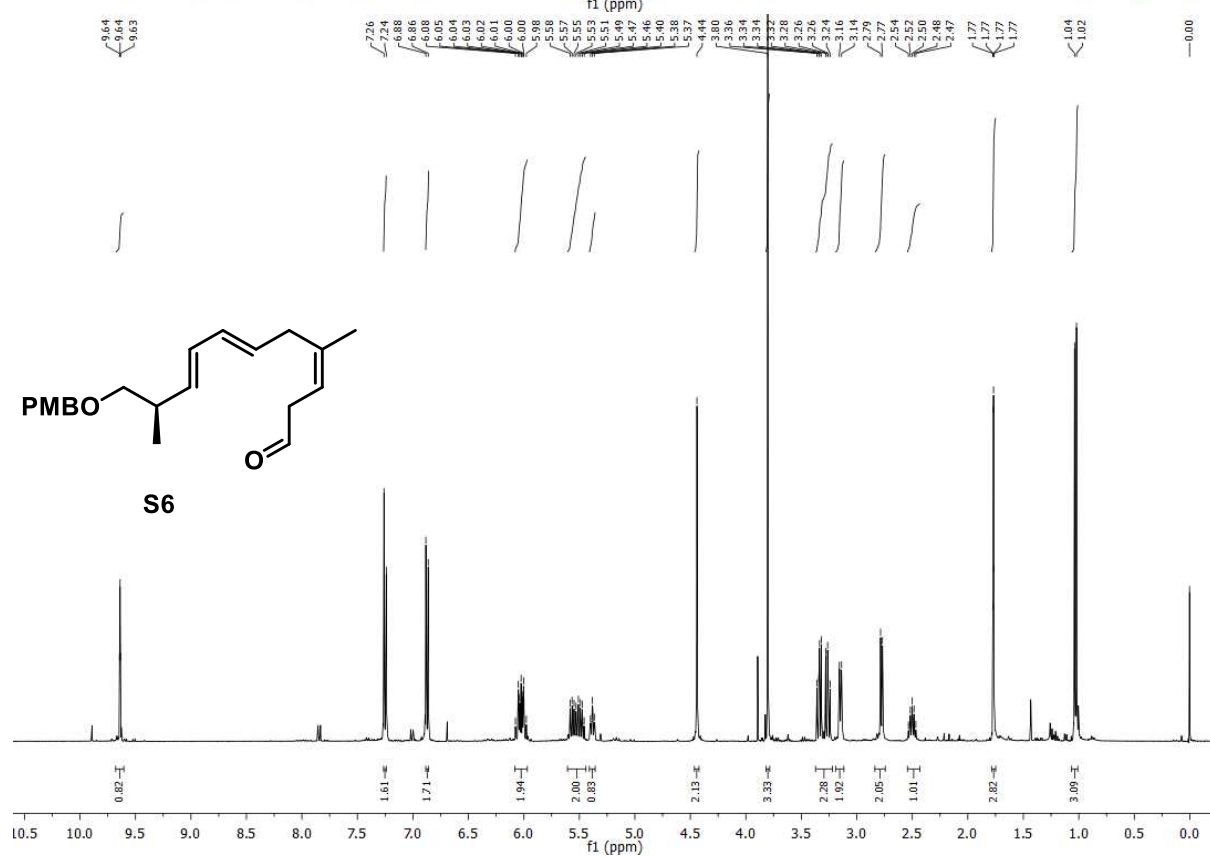

# Ester 14

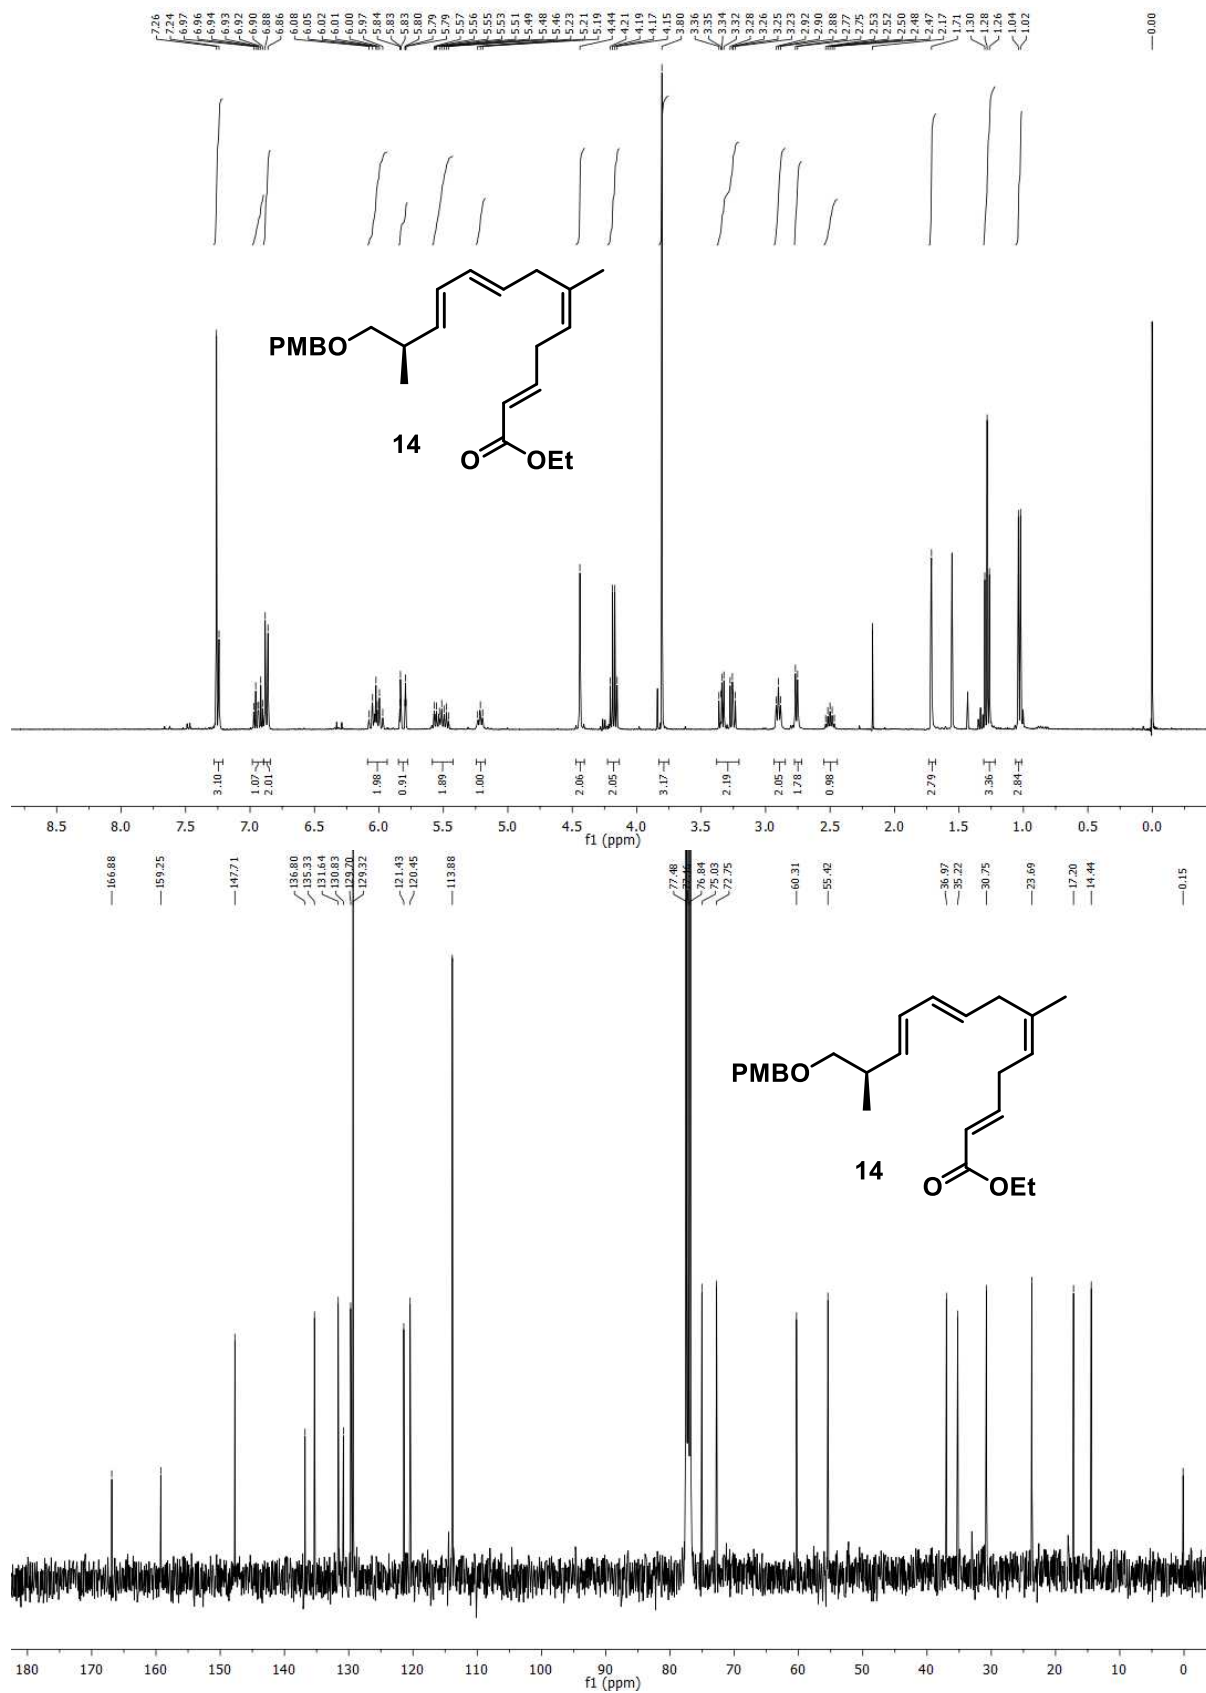

The figure displays the  $^1\text{H}$  and  $^{13}\text{C}$  NMR spectra of compound **15**, which is a long-chain unsaturated aldehyde with a PMBO group and a chiral center. The chemical structure of **15** is shown in the top left corner of each spectrum.

**$^1\text{H}$  NMR Spectrum (Top):** The spectrum shows peaks in the aromatic region (6.8–7.3 ppm), alkene region (5.5–6.2 ppm), aliphatic region (1.0–2.8 ppm), and a TMS peak at 0.00 ppm. Integration values are provided below the baseline.

| Chemical Shift (ppm) | Integration |
|----------------------|-------------|
| ~9.52                | 1.00        |
| ~7.26                | 2.66        |
| ~6.88                | 3.23        |
| ~6.15                | 1.15        |
| ~6.02                | 1.92        |
| ~5.58                | 2.07        |
| ~4.50                | 1.12        |
| ~4.50                | 2.01        |
| ~3.22                | 3.22        |
| ~2.36                | 2.36        |
| ~2.08                | 2.08        |
| ~1.98                | 1.98        |
| ~1.11                | 1.11        |
| ~1.59                | 2.89        |
| ~1.04                | 3.42        |

**$^{13}\text{C}$  NMR Spectrum (Bottom):** The spectrum shows peaks from 17 to 159 ppm. The TMS peak is at 0 ppm.

| Chemical Shift (ppm) |
|----------------------|
| 159.26               |
| 157.17               |
| 137.66               |
| 135.59               |
| 132.95               |
| 131.80               |
| 130.82               |
| 129.59               |
| 128.98               |
| 128.96               |
| 119.69               |
| 113.88               |
| 77.48                |
| 77.16                |
| 76.84                |
| 75.01                |
| 72.76                |
| 55.43                |
| 36.98                |
| 35.26                |
| 31.08                |
| 23.75                |
| 17.19                |

The figure displays the <sup>1</sup>H and <sup>13</sup>C NMR spectra of compound 16, along with its chemical structure.

**Chemical Structure of 16:** The structure shows a 4-methoxyphenyl group attached to a 1-methyl-4-(3-methyl-5-oxopent-1-en-1-yl)but-1-en-3-yl chain. The structure is labeled **16**.

**<sup>1</sup>H NMR Spectrum (Top):** The spectrum shows peaks in the aromatic region (6.7-7.3 ppm), a methoxy singlet (3.8 ppm), and aliphatic/methine signals (1.0-5.6 ppm). Integration values are provided below the peaks: 3.78, 2.64, 1.01, 2.97, 2.12, 1.00, 2.81, 4.15, 2.67, 2.24, 2.19, 1.62, 3.04, 2.78, and 2.78.

**<sup>13</sup>C NMR Spectrum (Bottom):** The spectrum shows peaks from 17.2 to 198.9 ppm. Key peaks include the carbonyl carbon at 198.86 ppm, aromatic carbons between 120-147 ppm, the methoxy carbon at 55.42 ppm, and aliphatic carbons from 17.19 to 36.97 ppm. The solvent peak for CDCl<sub>3</sub> is visible at 77.0 ppm.

# Adducts 17 and 18

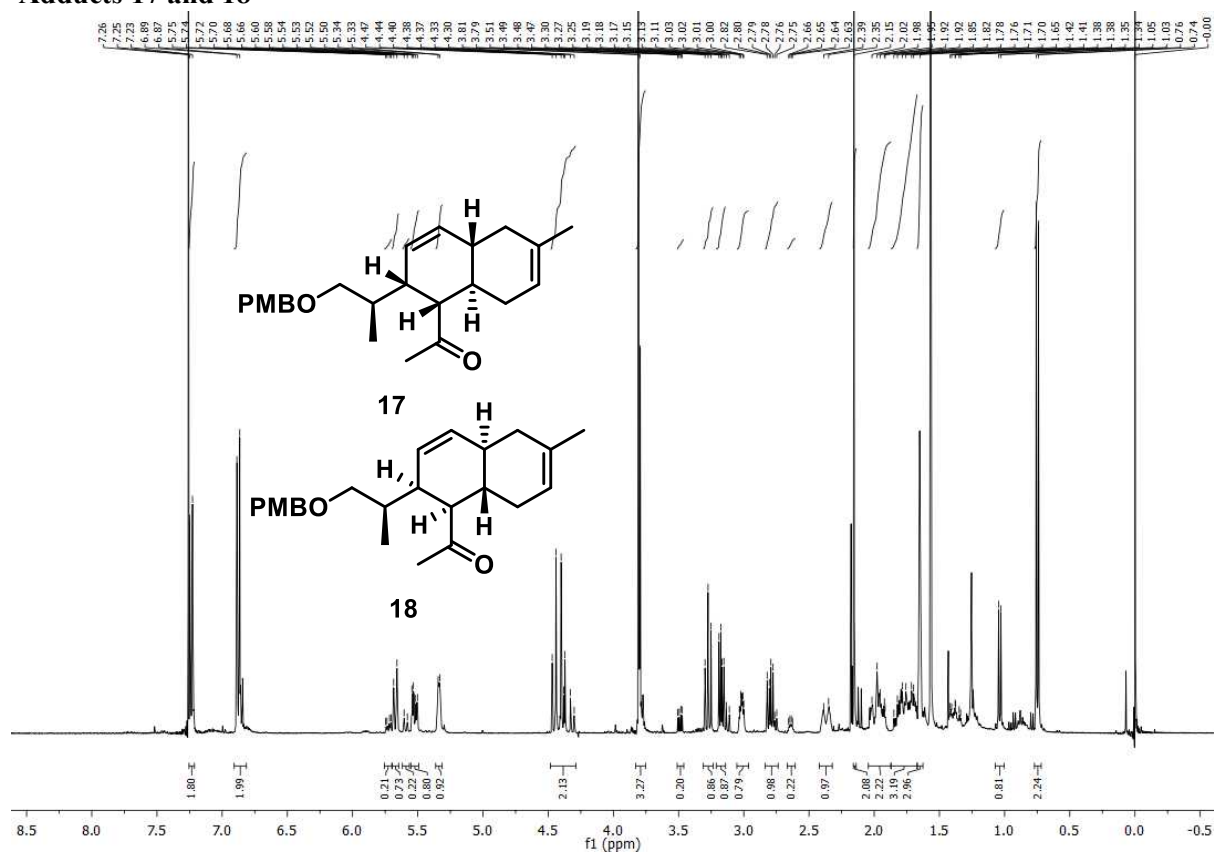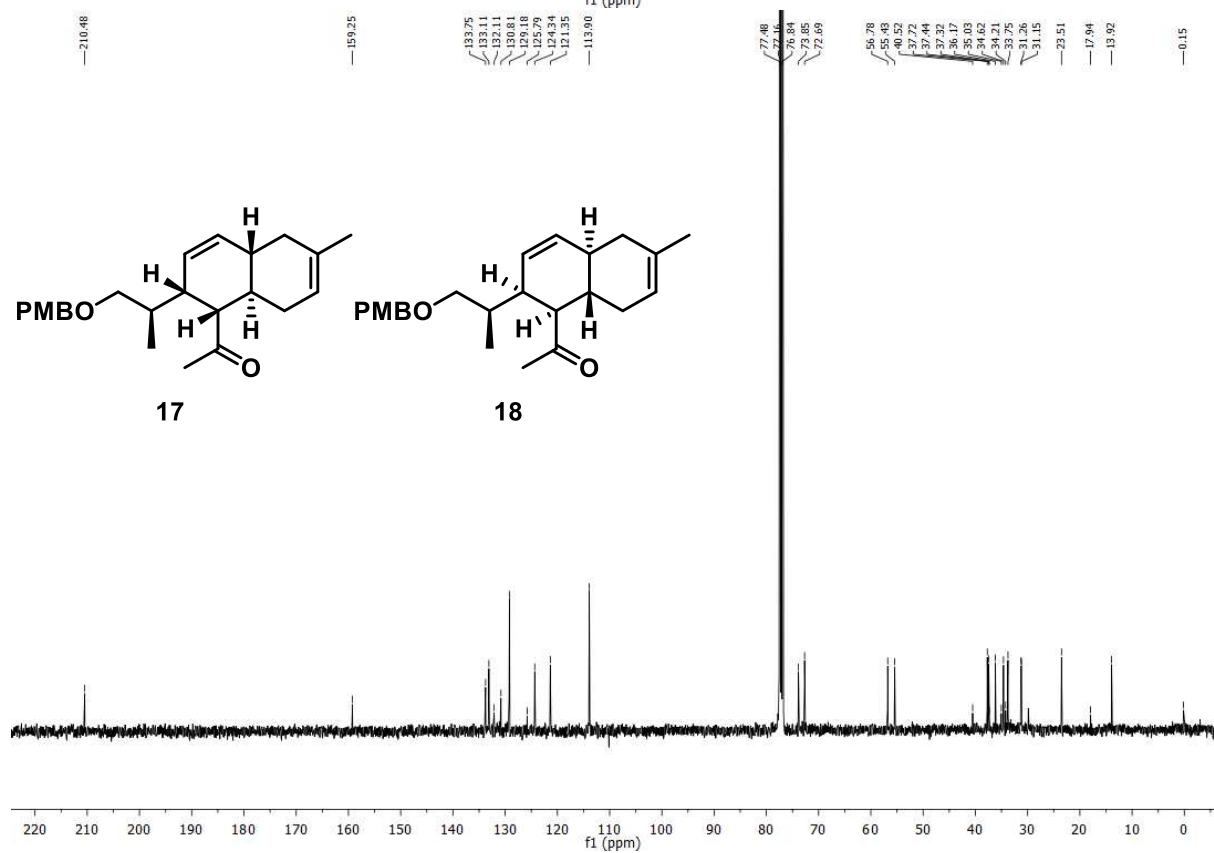

[illegible]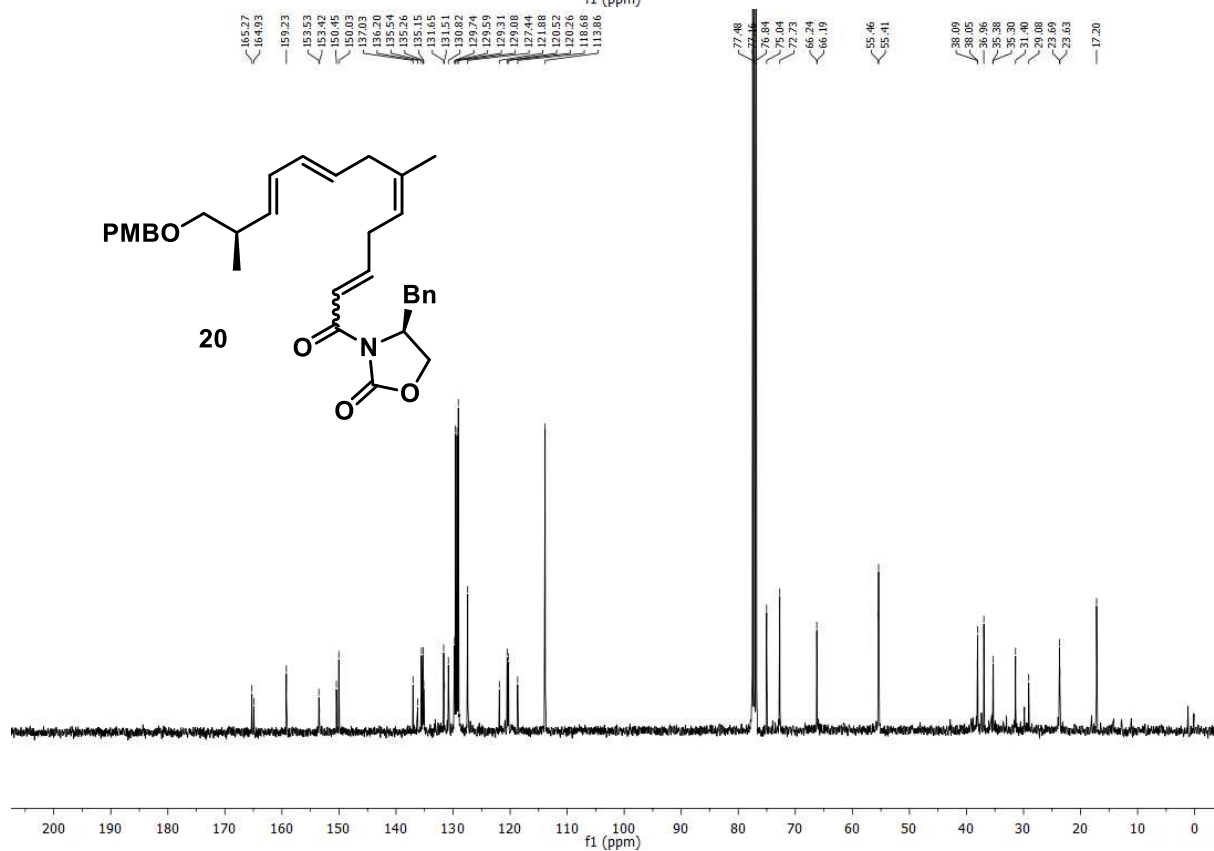

**Chemical structure of 22:** CC1=C(C)C[C@H]2C[C@@H](C[C@H](C1)C[C@@H](C2)C(=O)N(C[C@H](C3CCOC3=O)C)C)C(=O)C[C@H](C)C

**<sup>1</sup>H NMR spectrum (CDCl<sub>3</sub>):**

**Chemical shift (ppm):** 7.32, 7.31, 7.29, 7.28, 7.27, 7.26, 7.24, 7.23, 7.14, 7.12, 7.12, 6.98, 6.89, 6.87, 6.87, 6.86, 6.83, 5.67, 5.00, 4.44, 4.41, 4.40, 4.09, 4.07, 3.99, 3.98, 3.81, 3.80, 3.79, 3.77, 3.30, 3.28, 3.24, 3.23, 3.22, 3.20, 2.43, 2.40, 2.39, 2.37, 2.27, 2.27, 2.17, 2.05, 1.67, 1.63, 1.55, 1.43, 1.29, 1.28, 1.25, 1.24, 1.23, 1.09, 1.08, 0.89, 0.88, 0.86.

**Integration values:** 13.28, 2.04, 2.72, 0.41, 0.96, 1.21, 1.00, 0.26, 1.11, 3.18, 1.72, 1.09, 1.10, 3.42, 2.53, 2.32, 3.76, 4.27, 2.87, 3.82, 2.16, 1.49, 4.24.

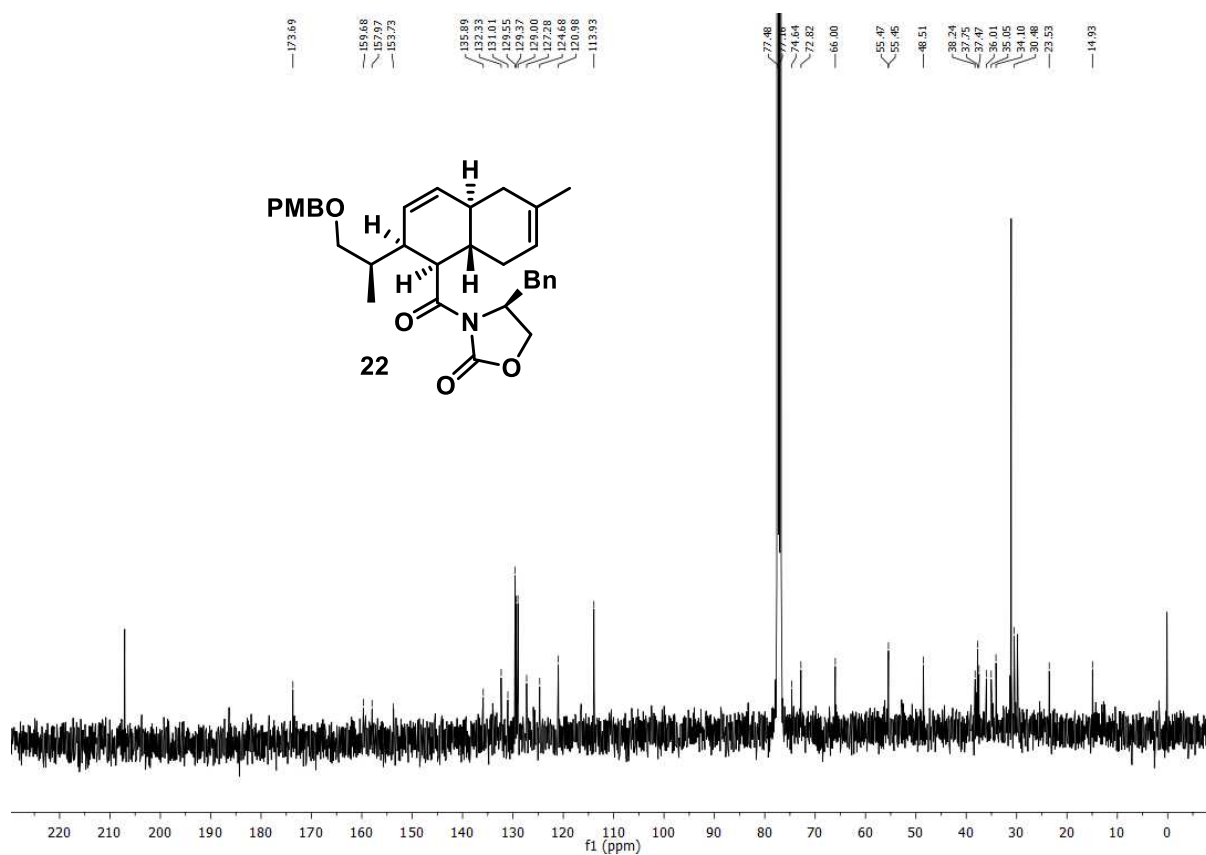

## Adducts 17-18

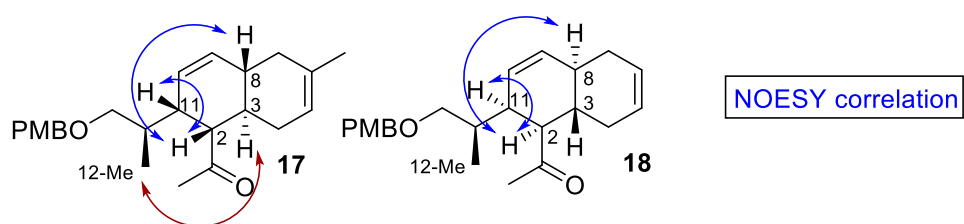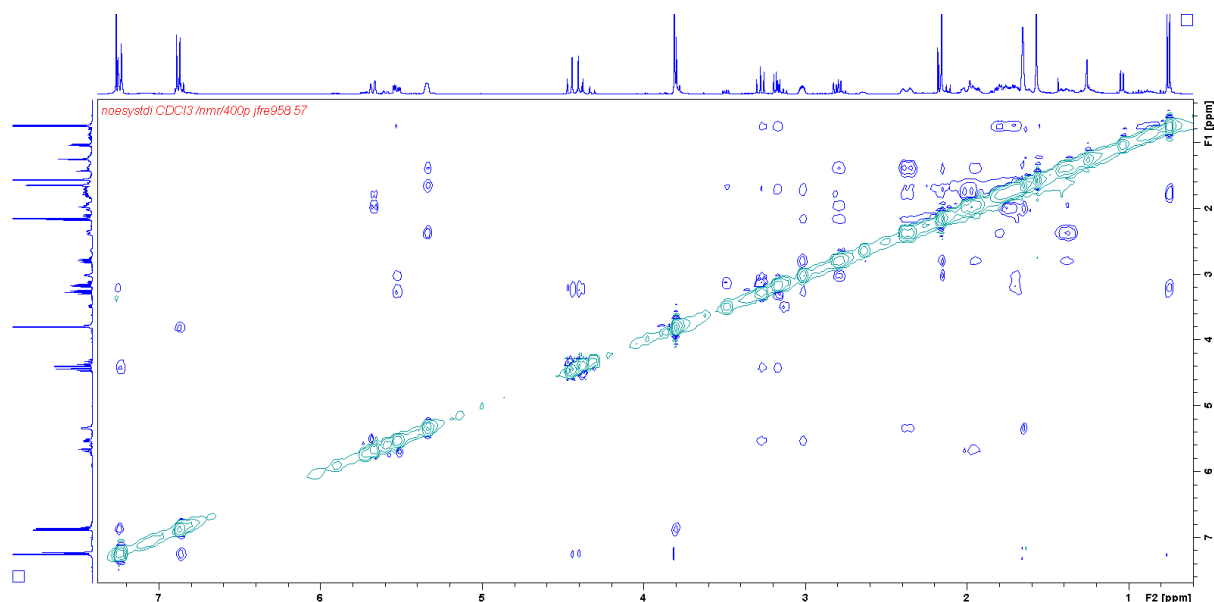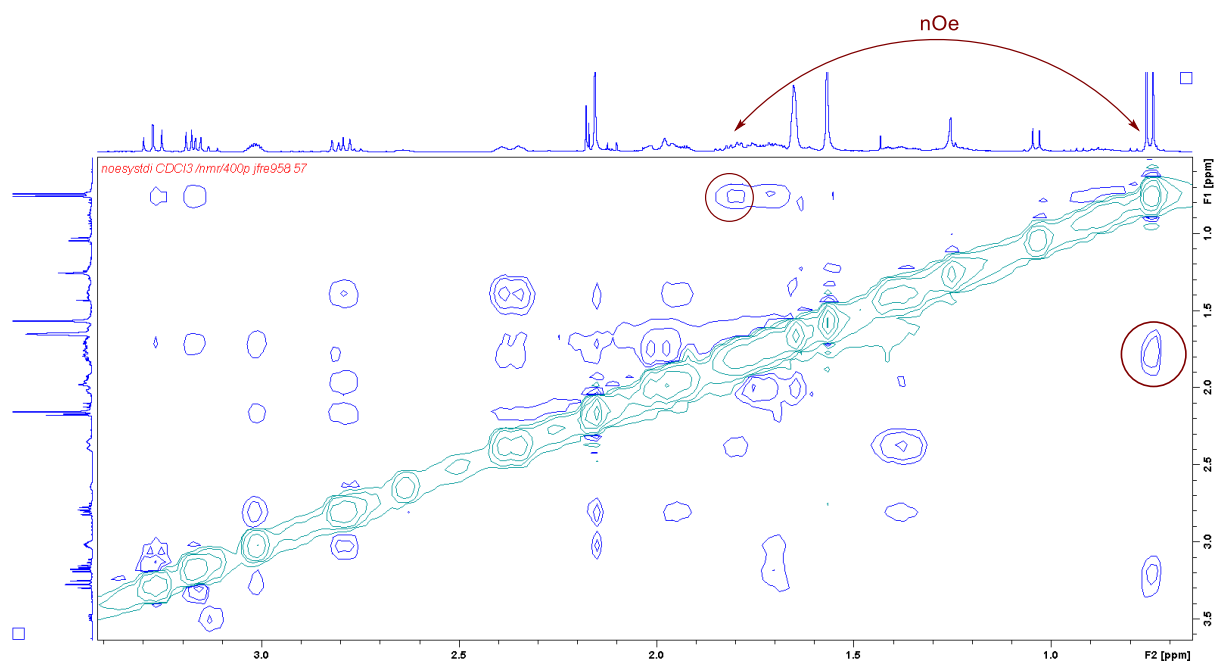

**Crystallization.** Single crystals of Adduct **22** were obtained by slow recrystallization of a solution of the compound in ethyl acetate.

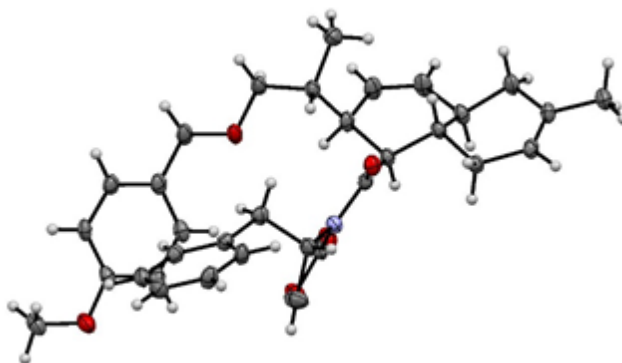

**Figure S1.** ORTEP diagram drawn with 50% ellipsoid probability of the crystal structure of Adduct **22**.

**Table S1.** Crystal data and structure refinement details for *N*-Ts bicyclic ketone **20**.

|                                                                 |                                                 |
|-----------------------------------------------------------------|-------------------------------------------------|
| Empirical formula                                               | C <sub>33</sub> H <sub>38</sub> NO <sub>5</sub> |
| Formula weight                                                  | 528.64                                          |
| Temperature (K)                                                 | 100                                             |
| Wavelength (Å)                                                  | 1.54184                                         |
| Crystal system                                                  | Triclinic                                       |
| Space group                                                     | P 1                                             |
| a (Å)                                                           | 9.1302(3)                                       |
| b (Å)                                                           | 9.1578(5)                                       |
| c (Å)                                                           | 10.2260(4)                                      |
| α (°)                                                           | 108.986(4)                                      |
| β (°)                                                           | 98.417(3)                                       |
| γ (°)                                                           | 114.037                                         |
| V (Å <sup>3</sup> )                                             | 698.83(6)                                       |
| Z                                                               | 1                                               |
| D <sub>c</sub> (Mg/m <sup>3</sup> )                             | 1.256                                           |
| F(000)                                                          | 283                                             |
| μ (mm <sup>-1</sup> )                                           | 0.670                                           |
| θ <sub>max</sub> (°)                                            | 68.241                                          |
| Total reflections                                               | 16713                                           |
| Unique reflections                                              | 4896                                            |
| Reflections [ <i>I</i> > 2σ( <i>I</i> )]                        | 0.0595                                          |
| Parameters                                                      | 356                                             |
| <i>R</i> <sub>int</sub>                                         | 0.0595                                          |
| Goodness-of-fit                                                 | 1.054                                           |
| <i>R</i> [ <i>F</i> <sub>2</sub> > 2σ( <i>F</i> <sub>2</sub> )] | 0.0448                                          |
| <i>wR</i> ( <i>F</i> <sub>2</sub> , all data)                   | 0.1169                                          |
